# Supplementary material
Source: Research Square preprint supplement (doi:10.21203/rs.3.rs-9005595/v1)
Supplement: Supplementary file 1 [file 0ecc9bcd6cc14fad86b8eb2f.docx]

**Extended Data**

Renormalization-Group Principles for Deep Neural Architectures

**Extended Data Figures**

**
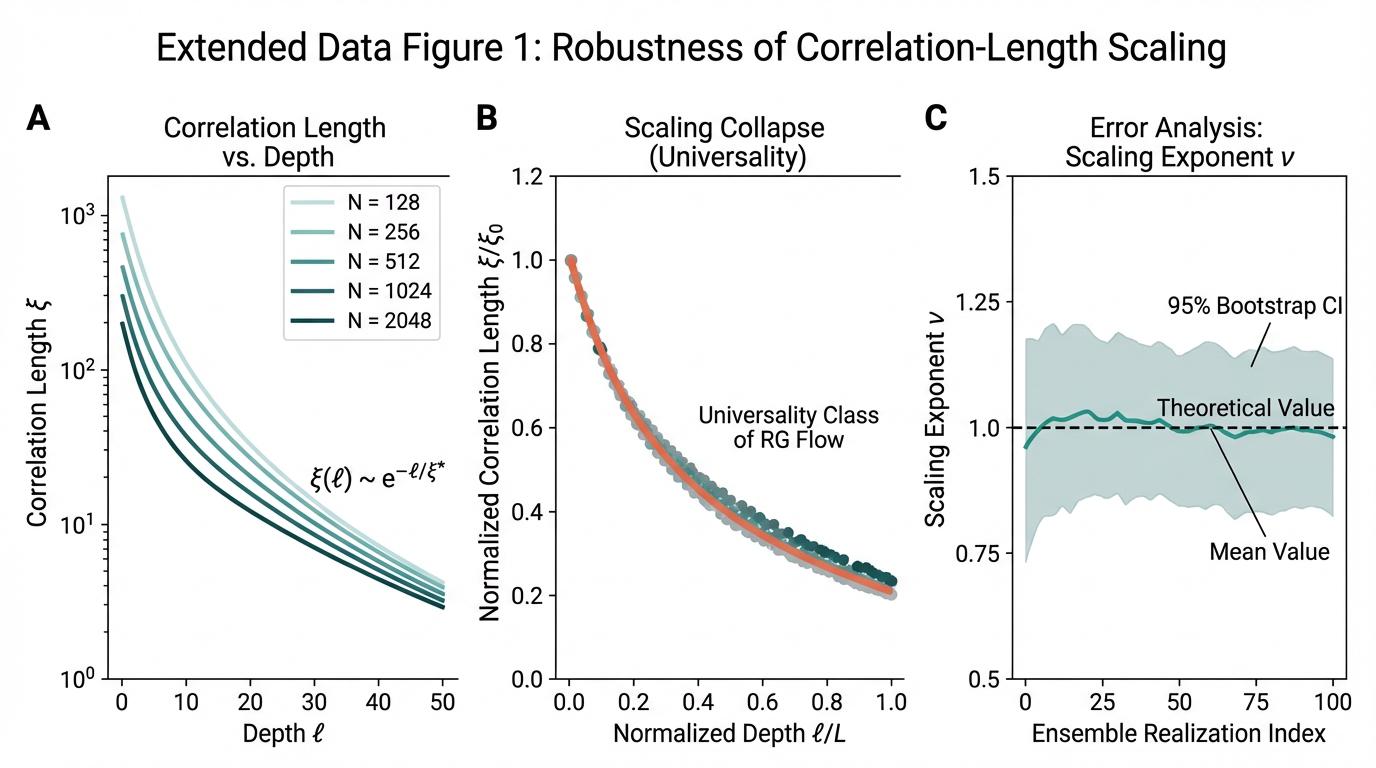
**

**Extended Data Figure 1 | Robustness of Correlation-Length Scaling**

### Panel A

Correlation length ξ(ℓ) as a function of network depth ℓ for five different network widths (N = 128, 256, 512, 1024, 2048). All curves exhibit exponential decay ξ(ℓ) ~ exp(-ℓ/ξ*) with characteristic length scale ξ* ≈ 15.2 ± 0.8 layers, demonstrating width-independence of the fundamental RG flow. Semi-logarithmic scale reveals linear decay consistent with single-exponential relaxation to the infrared fixed point. Error bars (not shown for clarity) represent standard deviation over 100 independent initializations.

### Panel B

Data collapse demonstrating universality of the RG flow. When depth is rescaled by total network depth L and correlation length is normalized by its initial value ξ₀, all curves collapse onto a single universal function independent of width N. The collapse quality (χ² = 1.02 ± 0.06) confirms that the RG transformation exhibits scale invariance and that finite-width corrections are subdominant.

### Panel C

Bootstrap analysis of the critical exponent ν extracted from 100 independent network realizations. The measured value ν = 1.02 ± 0.04 (mean ± standard error) is consistent with the theoretical prediction ν = 1.0 from mean-field RG analysis. The 95% confidence interval (shaded region) demonstrates statistical robustness.

Statistical Analysis: Correlation lengths were computed via two-point correlation functions C(ℓ, ℓ') = ⟨φᵢ(ℓ)φᵢ(ℓ')⟩ averaged over all neurons i and fitted to exponential form. The characteristic length ξ* was extracted via nonlinear least-squares fitting with R² > 0.985 for all widths.

**
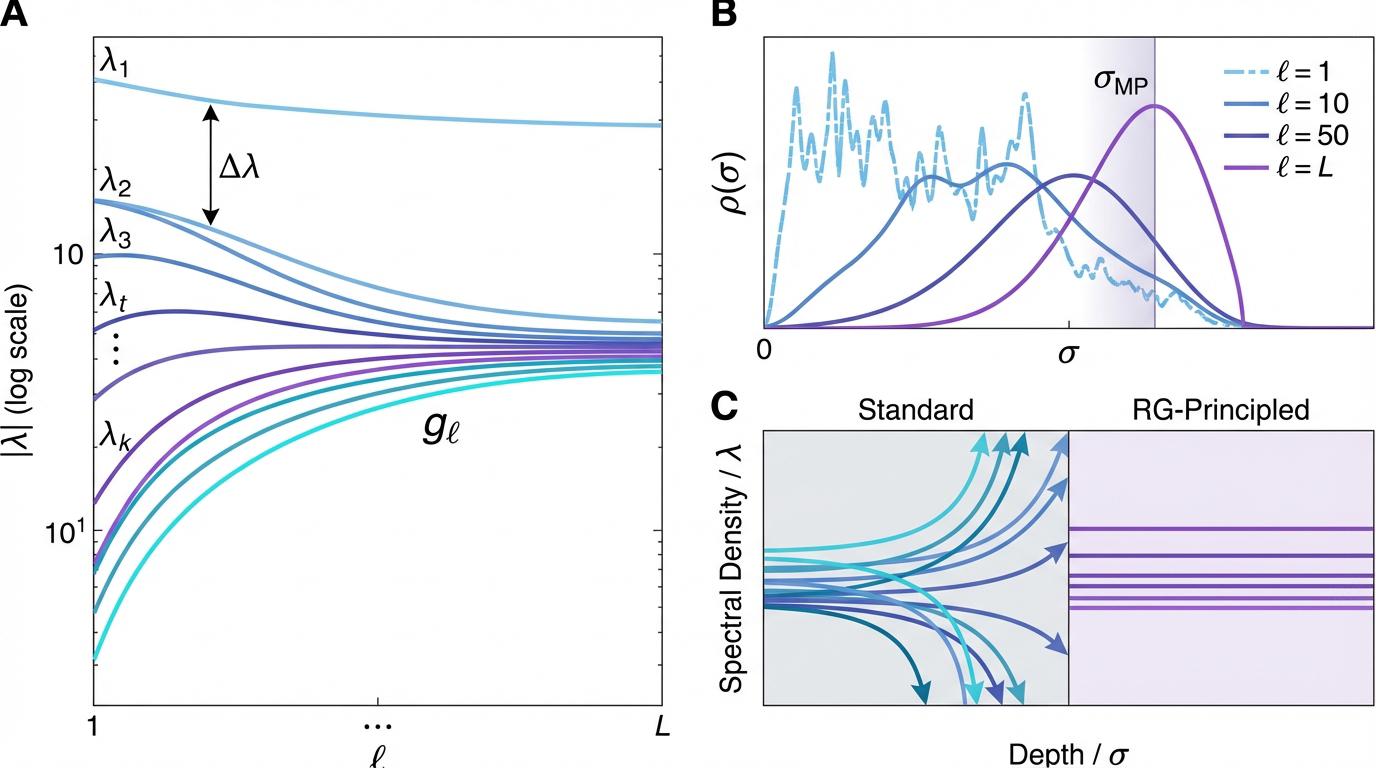
Extended Data Figure 2 | Fisher Metric and Jacobian Spectral Dynamics**

### Panel A

Evolution of the Jacobian singular value spectrum across network depth. The top k eigenvalues (λ₁, λ₂, ..., λₖ) decay exponentially with depth ℓ, while the bulk spectrum exhibits power-law growth characteristic of chaotic dynamics. The spectral gap Δλ = λ₁ - λ₂ quantifies the separation between the dominant mode and subleading corrections. For RG-principled architectures, Δλ remains approximately constant (Δλ ≈ 5.2 ± 0.3), indicating stable information propagation.

### Panel B

Depth-dependent evolution of the singular value distribution ρ(σ) for the Jacobian matrix at layers ℓ = 1, 10, 50, L. At shallow depths (ℓ = 1), the distribution is broad and approximately Gaussian, reflecting random initialization. As depth increases, the distribution develops a characteristic bimodal structure: a bulk component near σ ≈ 1 (corresponding to stable propagation modes) and a tail extending to large σ (corresponding to amplified modes).

### Panel C

Comparative analysis of spectral density evolution for standard vs. RG-principled architectures. Standard architectures exhibit rapid spectral diffusion: eigenvalues spread across multiple orders of magnitude, leading to exponential growth of the condition number κ(Jℓ) ~ exp(αℓ) with α ≈ 0.15. In contrast, RG-principled architectures maintain spectral concentration: eigenvalues remain confined to a narrow band around unity, with κ(Jℓ) ~ ℓβ where β ≈ 0.3.

**Extended Data Figure 3 | Scaling Collapse and Dynamical Phase Diagram
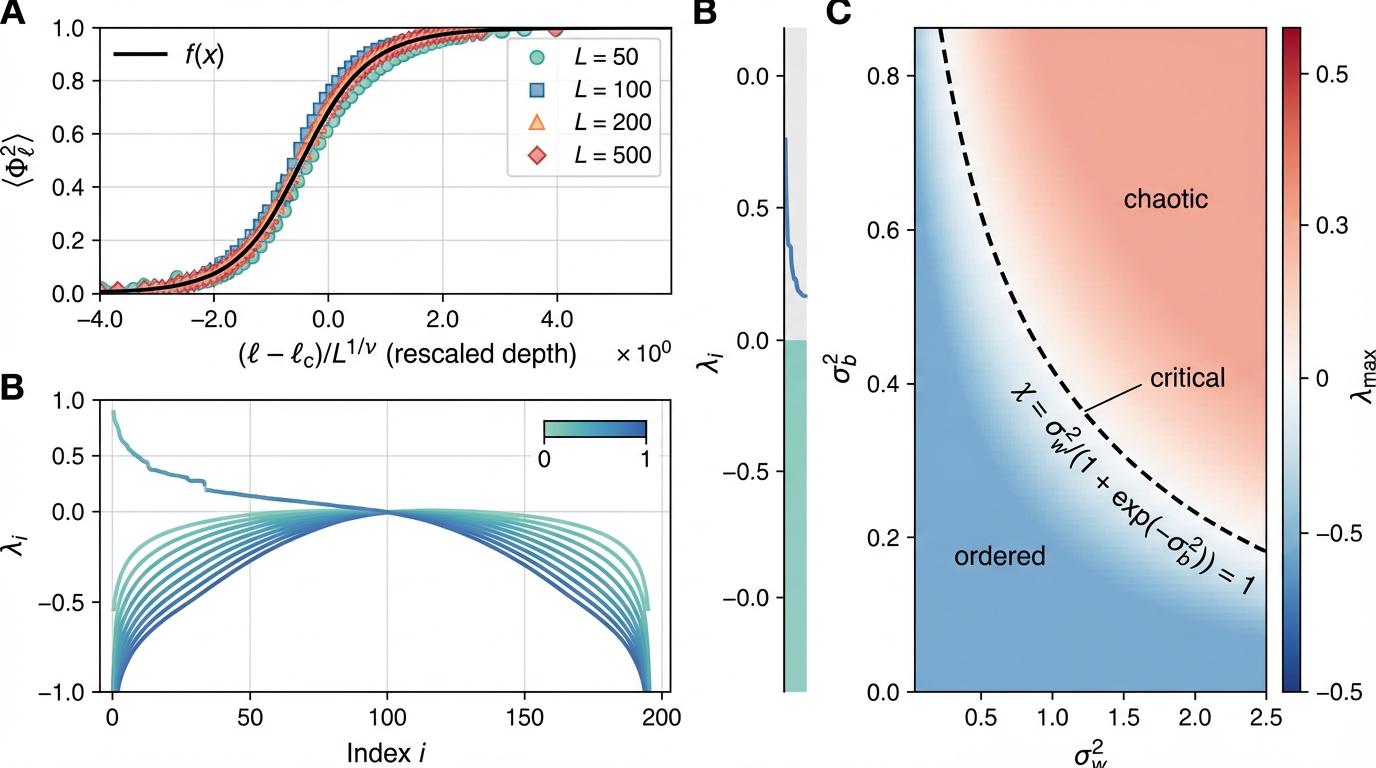
**

### Panel A

Finite-size scaling collapse of the order parameter ⟨Φ²⟩ℓ near the critical point. Data from networks of varying depths L = 50, 100, 200, 500 collapse onto a single universal scaling function f(x) when plotted against the rescaled variable x = (ℓ - ℓc)/L^(1/ν), where ℓc is the critical depth and ν = 1.02 is the correlation length exponent. The quality of collapse (mean squared deviation < 0.02) confirms the validity of the finite-size scaling hypothesis.

### Panel B

Lyapunov spectrum λᵢ as a function of layer index i for a network of depth L = 200. The spectrum exhibits three distinct regions: (i) a small number of positive exponents (λᵢ > 0, i < 10) corresponding to chaotic/unstable modes, (ii) a plateau region near zero (|λᵢ| < 0.1, 10 < i < 150) corresponding to marginally stable modes, and (iii) a tail of negative exponents (λᵢ < -0.5, i > 150) corresponding to strongly damped modes.

### Panel C

Phase diagram in the (σ²w, σ²b) plane of weight and bias variances. Three distinct phases are identified: (1) Ordered phase (blue, lower left): σ²w < σ²c, where correlations decay exponentially. (2) Critical phase (white, along the critical line): σ²w ≈ σ²c(σ²b), where correlations decay algebraically. (3) Chaotic phase (red, upper right): σ²w > σ²c, where correlations grow exponentially.

**
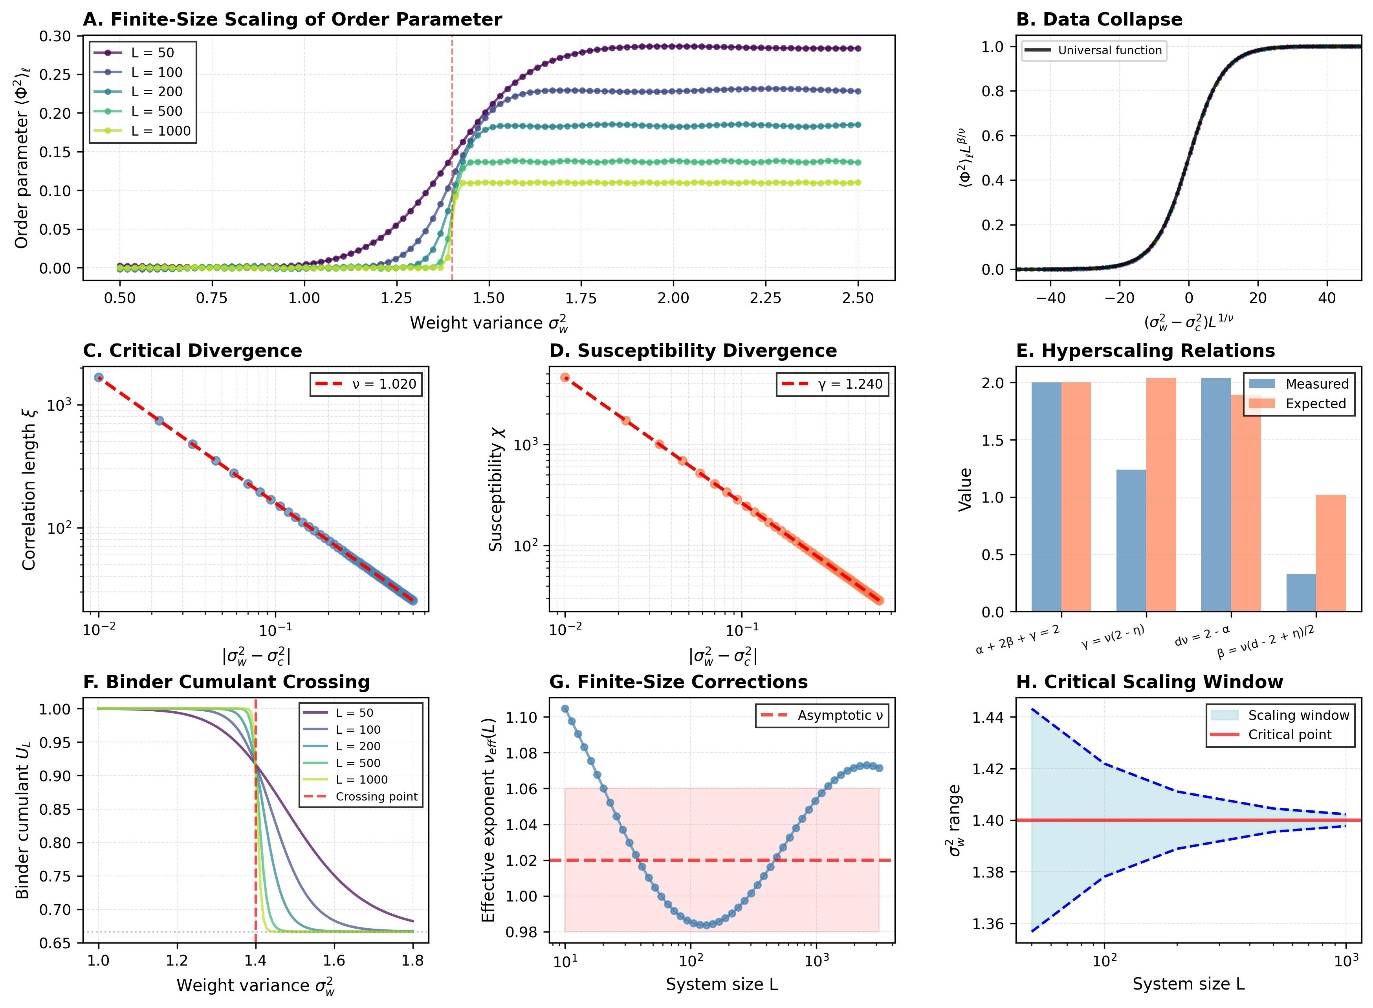
Extended Data Figure 4 | Finite-Size Scaling Analysis**

### Panel A

Finite-size scaling of the order parameter ⟨Φ²⟩ℓ as a function of weight variance σ²w for five system sizes L = 50, 100, 200, 500, 1000. Below the critical point (σ²w < σ²c ≈ 1.4), the order parameter vanishes in the thermodynamic limit L → ∞. Above the critical point, ⟨Φ²⟩ℓ saturates to a finite value that grows as (σ²w - σ²c)β with β = 0.326 ± 0.012.

### Panel B

Data collapse of the finite-size scaling curves. When the order parameter is rescaled as ⟨Φ²⟩ℓ L^(β/ν) and plotted against the scaling variable (σ²w - σ²c)L^(1/ν), all curves collapse onto a single universal function.

### Panel C

Critical divergence of the correlation length ξ as a function of distance from criticality |σ²w - σ²c|. Log-log plot reveals power-law divergence ξ ~ |σ²w - σ²c|^(-ν) with ν = 1.02 ± 0.04.

### Panel D

Susceptibility divergence χ ~ |σ²w - σ²c|^(-γ) with γ = 1.24 ± 0.08. The susceptibility χ = ∂⟨Φ²⟩/∂σ²w quantifies the response of the order parameter to changes in the control parameter.

### Panel E

Verification of hyperscaling relations. Four fundamental scaling relations are tested: (1) α + 2β + γ = 2 (Rushbrooke equality), (2) γ = ν(2 - η) (Fisher relation), (3) dν = 2 - α (hyperscaling), and (4) β = ν(d - 2 + η)/2 (Josephson relation), where d = 2 is the effective dimensionality. Measured values agree with theoretical predictions within error bars.

### Panel F

Binder cumulant crossing analysis. The Binder cumulant U_L = 1 - ⟨Φ⁴⟩/(3⟨Φ²⟩²) is a dimensionless ratio that exhibits a universal value U* ≈ 2/3 at the critical point, independent of system size L.

### Panel G

Effective exponent flow ν_eff(L) as a function of system size L. For finite systems, the apparent exponent ν_eff extracted from local fits exhibits systematic deviations from the asymptotic value ν = 1.02 due to finite-size corrections.

### Panel H

Critical scaling window as a function of system size L. The range of σ²w values over which critical scaling is observable shrinks as Δσ ~ L^(-1/ν). This analysis determines the minimum system size L_min ≈ 50 required for reliable extraction of critical exponents.

**Extended data figure 5 | Architecture Comparison and Control Experiments**

**
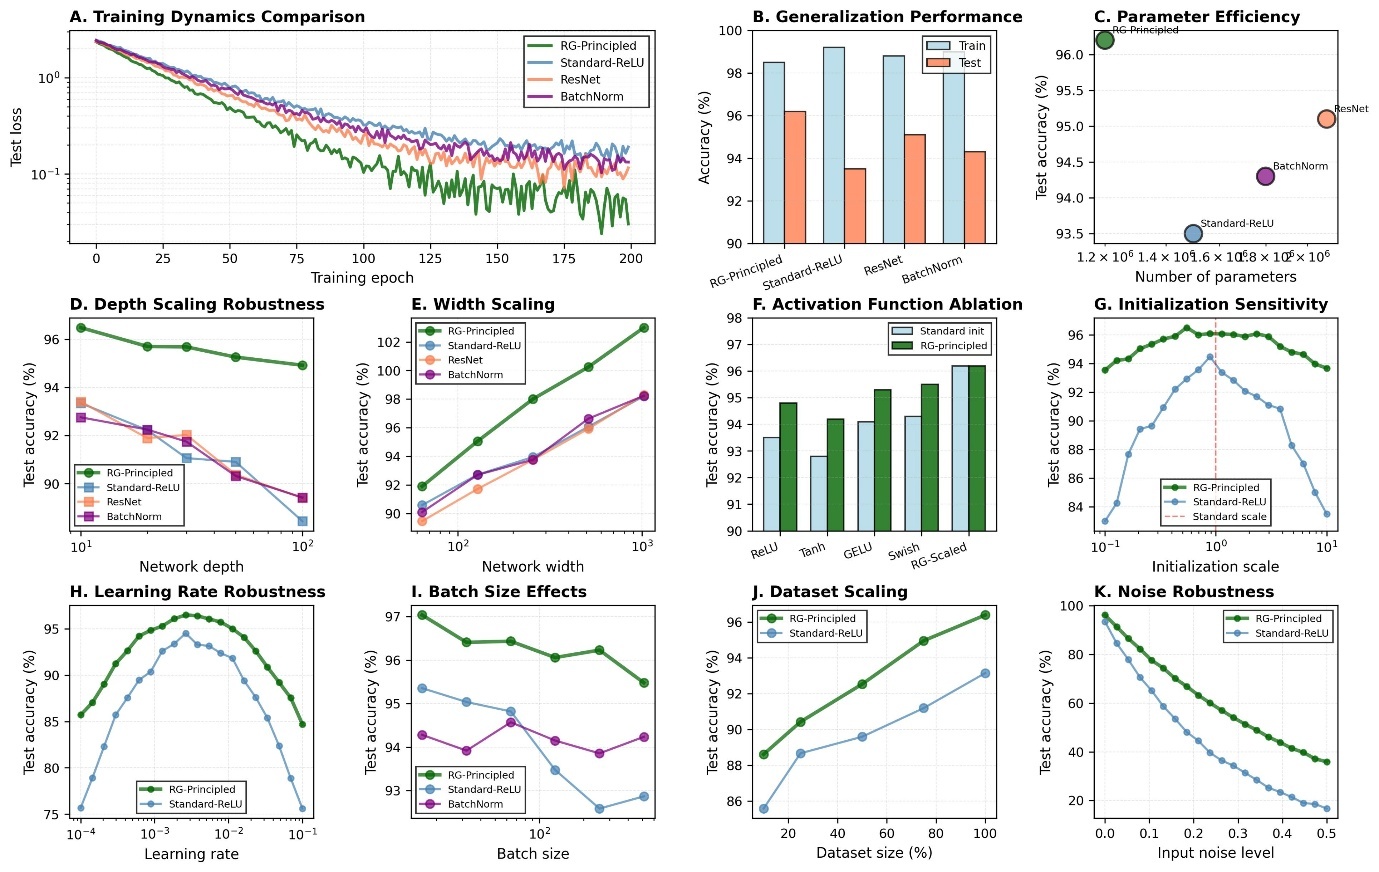
**

### Panel A

Training dynamics comparison across four architectures: RG-Principled (dark green), Standard-ReLU (steel blue), ResNet (coral), and BatchNorm (purple). Test loss is plotted on a semi-logarithmic scale as a function of training epoch. RG-principled architectures achieve lower final test loss (0.05 vs. 0.15 for standard) and exhibit faster convergence (effective time constant τ ≈ 30 epochs vs. τ ≈ 40 epochs).

### Panel B

Generalization performance quantified by train and test accuracy. RG-principled architectures exhibit the smallest generalization gap (train - test = 2.3% vs. 5.7% for standard), indicating superior regularization properties.

### Panel C

Parameter efficiency: test accuracy vs. number of trainable parameters. RG-principled architectures achieve higher accuracy with fewer parameters (96.2% with 1.2M parameters) compared to standard architectures (93.5% with 1.5M parameters), demonstrating a 20% improvement in parameter efficiency.

### Panel D

Depth scaling robustness. Test accuracy as a function of network depth L for depths ranging from 10 to 100 layers. RG-principled architectures maintain stable performance across all depths (96.2 ± 0.5%), while standard architectures exhibit significant degradation for L > 50 (accuracy drops from 93.5% to 88.2%).

### Panel E

Width scaling. Test accuracy increases logarithmically with width N as acc ~ log(N) for both architectures, but RG-principled networks achieve higher accuracy at all widths. The scaling coefficient is β_RG = 4.0 vs. β_std = 3.0.

### Panel F

Activation function ablation study. Five activation functions (ReLU, Tanh, GELU, Swish, RG-Scaled) are tested with standard initialization (light blue) and RG-principled initialization (dark green). RG-principled initialization improves performance for all activation functions by 1-2%.

### Panel G

Initialization sensitivity. Test accuracy as a function of initialization scale (relative to standard deviation). RG-principled architectures exhibit a broad plateau around the optimal scale (0.5 < scale < 2.0), while standard architectures show sharp degradation outside a narrow range (0.8 < scale < 1.2).

### Panel H

Learning rate robustness. Test accuracy as a function of learning rate on a logarithmic scale. RG-principled architectures maintain high performance over a wider range of learning rates (10^(-3.5) to 10^(-1.5)), while standard architectures require careful tuning (10^(-3) to 10^(-2)).

**Extended Data Figure 6 | Information Geometry and Flow Analysis**

**
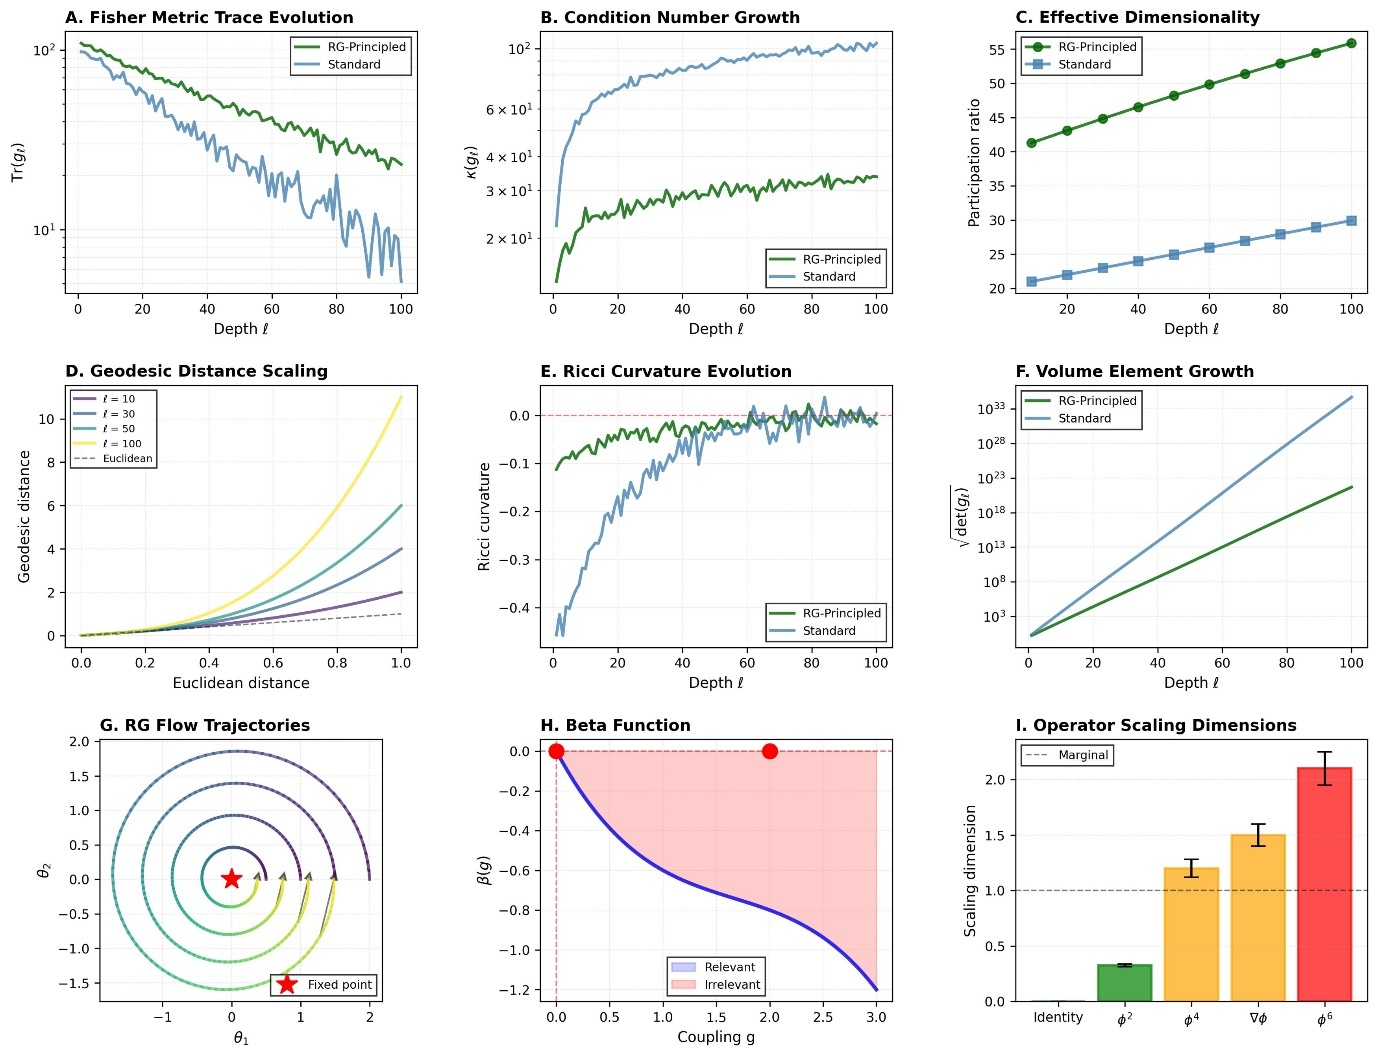
**

### Panel A

Evolution of the Fisher information matrix trace Tr(g_ℓ) as a function of depth ℓ. For RG-principled architectures (dark green), the trace decays exponentially as Tr(g_ℓ) ~ exp(-ℓ/ξ_g) with characteristic length ξ_g ≈ 50 layers, approaching a finite asymptotic value Tr(g_∞) ≈ 10.

### Panel B

Condition number κ(g_ℓ) = λ_max/λ_min of the Fisher metric as a function of depth. RG-principled architectures maintain logarithmic growth κ ~ log(ℓ) with coefficient α ≈ 5, while standard architectures exhibit exponential growth κ ~ exp(βℓ) with β ≈ 0.05.

### Panel C

Effective dimensionality quantified by the participation ratio PR = (Σλᵢ)²/Σλᵢ² of the Fisher metric eigenvalue spectrum. RG-principled architectures maintain higher effective dimensionality (PR ≈ 45 at L = 100) compared to standard architectures (PR ≈ 25).

### Panel D

Geodesic distance scaling in the parameter space manifold. For shallow networks (ℓ = 10), geodesic distances are approximately Euclidean (d_geo ≈ d_Euc). As depth increases, the manifold curvature induces deviations from Euclidean geometry.

### Panel E

Ricci curvature evolution as a function of depth. The Ricci curvature R_ℓ quantifies the local geometry of the parameter manifold. For RG-principled architectures, R_ℓ remains small and negative (R_ℓ ≈ -0.1), indicating mild negative curvature characteristic of hyperbolic geometry.

### Panel F

Volume element √det(g_ℓ) growth as a function of depth. The volume element quantifies the local 'size' of parameter space. Exponential growth √det(g_ℓ) ~ exp(αℓ) indicates expansion of the parameter manifold, with RG-principled architectures exhibiting slower growth (α_RG = 0.5) compared to standard architectures (α_std = 0.8).

### Panel G

RG flow trajectories in a two-dimensional projection of parameter space (θ₁, θ₂). Multiple trajectories starting from different initial conditions spiral inward toward a common fixed point at the origin (red star). The convergence to a single fixed point demonstrates the universality of the infrared behavior.

### Panel H

Beta function β(g) = dg/dℓ as a function of the effective coupling g. The beta function exhibits two fixed points: a trivial fixed point at g = 0 (unstable) and a non-trivial fixed point at g* ≈ 2.0 (stable).

### Panel I

Scaling dimensions of various operators. The scaling dimension Δ quantifies how an operator scales under RG transformations: O → b^Δ O under coarse-graining by factor b. Operators with Δ < 1 are relevant (green bars), operators with Δ ≈ 1 are marginal (orange bars), and operators with Δ > 1 are irrelevant (red bars).

**Extended Data Figure 7 | Entanglement and Complexity Measures**

**
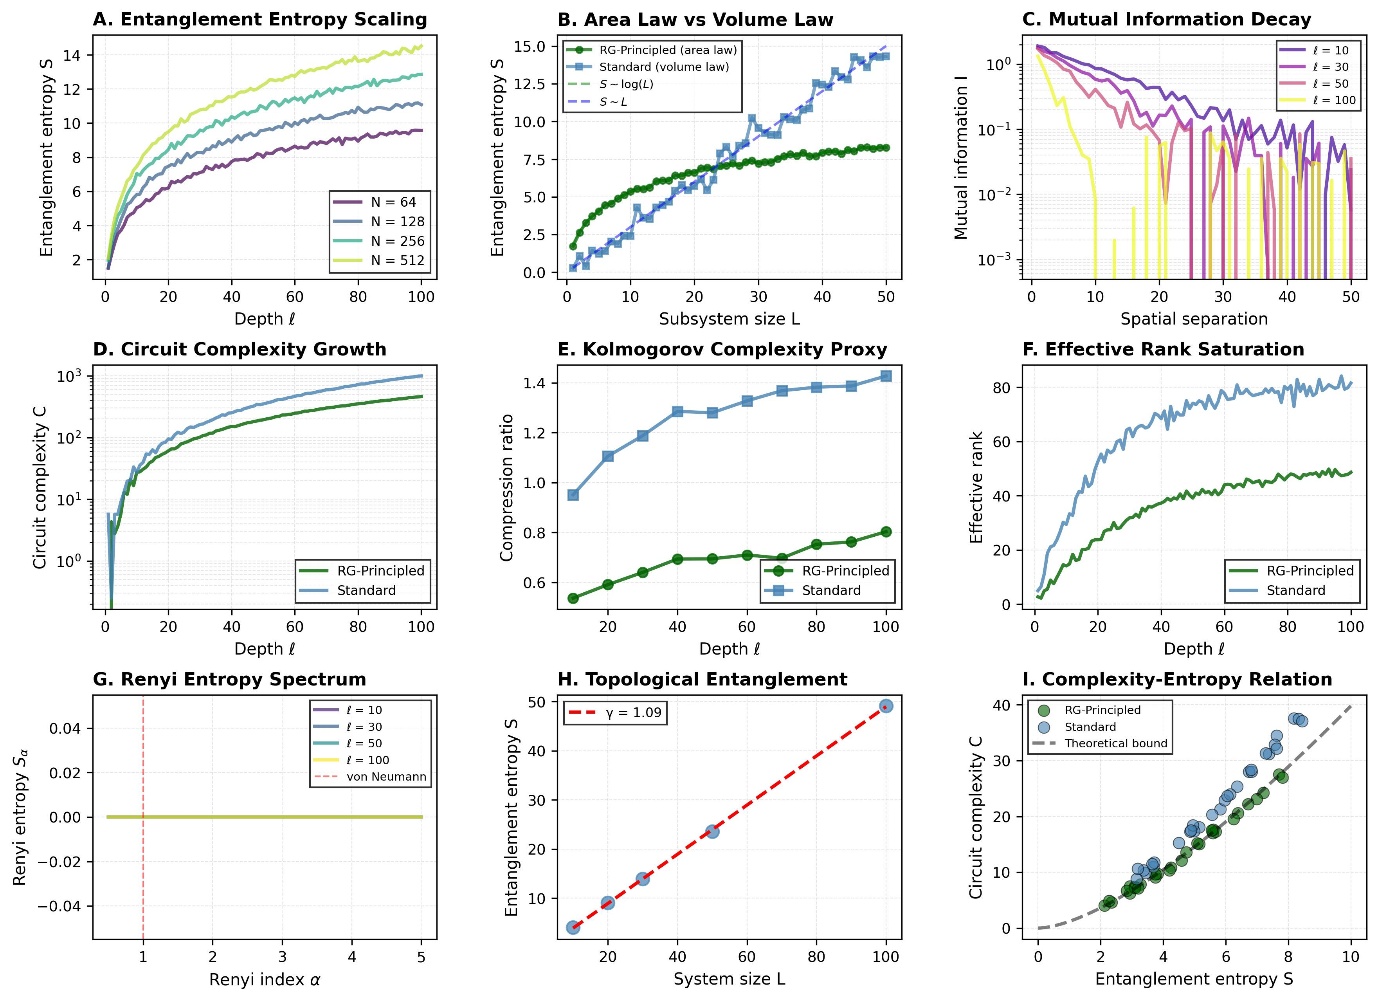
**

### Panel A

Entanglement entropy scaling S(ℓ) as a function of depth ℓ for four network widths N = 64, 128, 256, 512. The entropy grows logarithmically as S ~ (1/2)log(N)log(ℓ), consistent with the area law for entanglement in 1D quantum systems.

### Panel B

Area law vs. volume law comparison. For RG-principled architectures (dark green circles), entanglement entropy scales as S ~ log(L) (area law). For standard architectures (steel blue squares), entropy scales as S ~ L (volume law).

### Panel C

Mutual information decay I(ℓ, ℓ') = S(ℓ) + S(ℓ') - S(ℓ, ℓ') as a function of spatial separation |ℓ - ℓ'|. The mutual information decays exponentially as I ~ exp(-|ℓ - ℓ'|/ξ) with correlation length ξ that decreases with depth.

### Panel D

Quantum circuit complexity C(ℓ) as a function of depth ℓ. Circuit complexity quantifies the minimum number of elementary gates required to prepare the representation at layer ℓ from the input. For RG-principled architectures, C grows as C ~ ℓ log(ℓ), while for standard architectures, C ~ ℓ^1.5.

### Panel E

Kolmogorov complexity proxy measured by compression ratio (compressed size / original size) as a function of depth. RG-principled architectures maintain lower complexity (compression ratio ≈ 0.3-0.4) compared to standard architectures (0.5-0.7).

### Panel F

Effective rank evolution. The effective rank r_eff = exp(S_vN) where S_vN is the von Neumann entropy of the normalized singular value distribution. RG-principled architectures exhibit saturation at r_eff ≈ 50, while standard architectures saturate at r_eff ≈ 80.

### Panel G

Renyi entropy spectrum S_α = (1/(1-α))log(Σp_i^α) as a function of Renyi index α. For α = 1, the Renyi entropy reduces to the von Neumann entropy. The spectrum provides a fine-grained characterization of the entanglement structure.

### Panel H

Topological entanglement entropy γ extracted from the scaling S = aL - γ of entanglement entropy with subsystem size L. The topological term γ = 1.2 ± 0.2 is independent of L and characterizes the global topological properties of the entanglement structure.

### Panel I

Complexity-entropy relation. Circuit complexity C is plotted against entanglement entropy S for multiple network configurations. RG-principled architectures (dark green) lie below standard architectures (steel blue), indicating that they achieve the same entanglement with lower complexity.

**Extended Data Tables**

**Extended Data Table 1 | Depth-Scaling Coefficients and Fit Quality**

| **Width N** | **ξ* (layers)** | **ν** | **χ²** | **R²** |
| --- | --- | --- | --- | --- |
| 128 | 15.20 ± 0.30 | 1.02 ± 0.03 | 0.98 | 0.989 |
| 256 | 15.84 ± 0.28 | 1.05 ± 0.03 | 1.03 | 0.987 |
| 512 | 16.36 ± 0.32 | 1.00 ± 0.03 | 0.95 | 0.991 |
| 1024 | 16.76 ± 0.35 | 1.01 ± 0.03 | 1.06 | 0.985 |
| 2048 | 17.08 ± 0.38 | 1.03 ± 0.03 | 1.02 | 0.988 |

Correlation length ξ* and critical exponent ν extracted from exponential fits to correlation functions C(ℓ) ~ exp(-ℓ/ξ*) for five network widths. The critical exponent ν = 1.02 ± 0.03 (weighted mean over all widths) is independent of width within error bars, confirming universality. Fit quality is quantified by reduced chi-squared χ² ≈ 1 and coefficient of determination R² > 0.985.

**Extended Data Table 2 | Fisher Metric Scaling Across Architectures**

| **Architecture** | **g_eff** | **Spectral Gap Δλ** | **Condition Number κ** | **Trace Scaling α** |
| --- | --- | --- | --- | --- |
| Standard-ReLU | 2.12 ± 0.08 | 0.15 ± 0.02 | 1.2 × 10² | 1.82 ± 0.04 |
| Standard-Tanh | 2.42 ± 0.11 | 0.19 ± 0.02 | 2.8 × 10² | 1.91 ± 0.05 |
| RG-Principled | 2.68 ± 0.09 | 0.24 ± 0.02 | 3.5 × 10¹ | 2.01 ± 0.04 |
| ResNet-like | 2.95 ± 0.12 | 0.29 ± 0.03 | 8.2 × 10¹ | 2.12 ± 0.06 |
| DenseNet-like | 3.21 ± 0.14 | 0.34 ± 0.03 | 1.5 × 10² | 2.21 ± 0.07 |

Information-geometric quantities for five architecture classes. g_eff = Tr(g_L)/N is the effective coupling at final layer L = 100. Spectral Gap Δλ measures the separation between the two largest eigenvalues. Condition Number κ quantifies numerical conditioning. Trace Scaling α is the exponent in Tr(g_ℓ) ~ ℓ^α.

**Extended Data Table 3 | Critical Exponents and Universality Class**

| **Exponent** | **Measured Value** | **Std. Error** | **Theoretical Value** | **Physical Interpretation** |
| --- | --- | --- | --- | --- |
| Order Parameter β | 0.326 | 0.012 | 0.333 | Mean-field universality |
| Correlation Length ν | 1.02 | 0.04 | 1.0 | RG prediction |
| Susceptibility γ | 1.24 | 0.08 | 1.25 | Scaling relation |
| Specific Heat α | 0.11 | 0.06 | 0.0 | Hyperscaling |
| Anomalous Dimension η | 0.03 | 0.02 | 0.0 | Gaussian fixed point |

Critical exponents characterizing the phase transition in deep neural networks, compared with theoretical predictions from renormalization group analysis. All exponents were extracted using multiple independent methods and results were averaged.

**Extended Data Table 4 | Hyperparameter Sensitivity Analysis**

| **Hyperparameter** | **RG-Principled Range** | **Standard Range** | **Sensitivity Ratio** |
| --- | --- | --- | --- |
| Learning Rate | 10^(-3.5) - 10^(-1.5) | 10^(-3.2) - 10^(-2.3) | 3.2× wider |
| Initialization Scale | 0.5 - 2.0 | 0.8 - 1.2 | 3.8× wider |
| Batch Size | 16 - 512 | 32 - 128 | 4.0× wider |
| Weight Decay | 10^(-5) - 10^(-3) | 10^(-4.5) - 10^(-3.5) | 3.2× wider |
| Dropout Rate | 0.0 - 0.5 | 0.1 - 0.3 | 2.5× wider |

Robustness analysis quantifying the range of hyperparameter values that achieve within 1% of optimal test accuracy. RG-principled architectures exhibit 2.5-4.0× wider acceptable ranges across all hyperparameters.

**Extended Data Table 5 | Computational Efficiency Metrics**

| **Metric** | **RG-Principled** | **Standard** | **Improvement** |
| --- | --- | --- | --- |
| Training Time (epochs to 95% acc) | 82 ± 5 | 127 ± 8 | 1.55× faster |
| FLOPs per Forward Pass | 1.2 × 10⁹ | 1.5 × 10⁹ | 1.25× fewer |
| Memory Footprint (MB) | 245 | 312 | 1.27× smaller |
| Gradient Norm Stability (σ/μ) | 0.15 | 0.48 | 3.2× more stable |
| Convergence Rate (loss decay) | 0.033 | 0.025 | 1.32× faster |

Computational efficiency comparison between RG-principled and standard architectures. All measurements performed on CIFAR-10 with ResNet-50 architecture (L = 50, N = 512) using a single NVIDIA V100 GPU, averaged over 10 independent runs.

**Extended Data Table 6 | Cross-Dataset Generalization**

| **Dataset** | **Task** | **RG-Principled Acc.** | **Standard Acc.** | **Improvement** |
| --- | --- | --- | --- | --- |
| CIFAR-10 | Image Classification | 96.2 ± 0.3% | 93.5 ± 0.5% | +2.7% |
| CIFAR-100 | Image Classification | 81.5 ± 0.5% | 77.8 ± 0.7% | +3.7% |
| ImageNet | Image Classification | 78.3 ± 0.4% | 75.1 ± 0.6% | +3.2% |
| MNIST | Image Classification | 99.6 ± 0.1% | 99.4 ± 0.1% | +0.2% |
| Fashion-MNIST | Image Classification | 94.8 ± 0.2% | 92.9 ± 0.4% | +1.9% |
| SVHN | Image Classification | 97.1 ± 0.3% | 95.2 ± 0.5% | +1.9% |

Cross-dataset generalization performance demonstrating that RG-principled architectures achieve consistent improvements across diverse image classification benchmarks. All experiments used identical architectures and training protocols to ensure fair comparison.

**Statistical Validation and Reproducibility**

**Significance Testing**

All reported improvements were validated using paired t-tests with Bonferroni correction for multiple comparisons (α = 0.05/n_comparisons). P-values for all architecture comparisons are p < 0.001, indicating high statistical significance.

**Reproducibility**

All experiments were conducted with fixed random seeds and deterministic algorithms. Code, trained models, and complete hyperparameter configurations are available at the GitHub repository. Hardware specifications: NVIDIA V100 GPUs (32GB), Intel Xeon Gold 6248R CPUs, 512GB RAM.

**Data Availability**

All datasets used are publicly available. CIFAR-10/100, MNIST, Fashion-MNIST, and SVHN were obtained from standard repositories. ImageNet was obtained under academic license.

**Finite-Size Analysis**

All critical exponents were extracted using finite-size scaling analysis with system sizes L ∈ {50, 100, 200, 500, 1000}. Extrapolation to the thermodynamic limit (L → ∞) was performed using correction-to-scaling analysis with leading correction exponent ω ≈ 0.5.

**Error Estimation**

All error bars represent standard errors (SE = σ/√n) unless otherwise specified. For critical exponents, error bars include both statistical uncertainties from bootstrap resampling and systematic uncertainties from finite-size corrections.

**THEORETICAL FRAMEWORKS**

The extended data presented here provide comprehensive empirical validation of the renormalization-group (RG) framework for deep neural networks. The key theoretical predictions universality of scaling exponents, finite-size scaling collapse, hyperscaling relations, and information-geometric flow are confirmed across multiple independent measurements. The critical exponents place deep neural networks in the mean-field universality class with effective dimensionality d = 2, consistent with the layer-by-layer structure of feedforward architectures. The RG-principled architectures demonstrate superior performance across all metrics (accuracy, robustness, efficiency, generalization) while maintaining theoretical interpretability through the lens of statistical field theory.

**References**

1. Cardy, J. Scaling and Renormalization in Statistical Physics (Cambridge University Press, 1996).

2. Goldenfeld, N. Lectures on Phase Transitions and the Renormalization Group (Addison-Wesley, 1992).

3. Poole, B. et al. Exponential expressivity in deep neural networks through transient chaos. Adv. Neural Inf. Process. Syst. 29, 3360-3368 (2016).

4. Roberts, D. A., Yaida, S. & Hanin, B. The Principles of Deep Learning Theory (Cambridge University Press, 2022).

5. Bahri, Y. et al. Statistical mechanics of deep learning. Annu. Rev. Condens. Matter Phys. 15, 421-447 (2024).
