# Supplementary material
Source: Research Square preprint supplement (doi:10.21203/rs.3.rs-9005595/v1)
Supplement: Supplementary file 2 [file cef8480e11f047261dc3dced.docx]

# **Supplementary Information: Renormalization-Group Principles for Deep Neural Architectures**

## 1. Extended Mathematical Framework

### 1.1 Formal Definitions

#### 1.1.1 Neural Network Architecture Specification

A deep neural network with **L layers** is defined as a hierarchical composition of nonlinear transformations. The **layer-wise activation map** for transforms representations from layer to layer , where denotes the **width** (number of neurons) at layer . The **input dimension** is and the **output dimension** is .

The **forward propagation equations** governing network dynamics are:

where:

- is the **weight matrix**
- is the **bias vector**
- denotes **pre-activations**
- denotes **post-activations**
- is an **element-wise nonlinear activation function**

The **complete network function** is the composition:

with **layer operator** . The **total parameter count** is , scaling as **O(LN²)** for constant width .

The **width ratio** characterizes dimensional expansion (), compression (), or preservation () at each layer.

#### 1.1.2 Representation Space Geometry

The **input data manifold** represents the low-dimensional structure of training data embedded in high-dimensional ambient space, with **intrinsic dimension** for structured data. Each layer induces a **representation manifold**:

where denotes the **partial network composition**.

The **tangent bundle** at point has fibers spanned by the **Jacobian columns**:

with **input-to-layer-ℓ Jacobian** . The **tangent space dimension** satisfies , with equality for **generic full-rank networks**.

The **induced Riemannian metric** on from the ambient Euclidean metric is:

This **metric tensor** encodes how infinitesimal distances in input space are distorted by the nonlinear transformation to layer , with **volume element** measuring local representation density.

#### 1.1.3 RG Flow Operator

The **renormalization group (RG) operator** implements **coarse-graining** by integrating out fine-scale degrees of freedom while preserving macroscopic observables. For neural networks:

where is the **linear propagator** and is the **nonlinear activator**.

The **cumulative RG flow** from layer to is:

with the **full network** as .

**RG fixed points** satisfy for all , corresponding to **self-similar representations** where coarse-graining preserves statistical structure. The **linearized stability operator** at fixed point :

has **eigenvalue classification**: (**relevant perturbations**, grow under RG), (**irrelevant perturbations**, decay), (**marginal perturbations**, scale-invariant).

### 1.2 Notation Expansions

#### 1.2.1 Index Conventions

A **hierarchical index system** navigates the multi-scale architecture:

| Index Type | Symbol | Range | Meaning |
| --- | --- | --- | --- |
| Input space |  |  | Data manifold coordinates |
| Hidden units |  |  | Neuron indices at layer |
| Layer depth |  |  | Network depth position |
| Path multi-index |  |  | Information flow paths |
| Parameters | (Greek, late) |  | Flattened parameter indices |

The **multi-index** enumerates **paths through the network** from input to layer , with denoting path length. The **total path count** is , growing exponentially with depth.

**Einstein summation convention**: Repeated indices in contravariant-covariant pairs are summed over their range. Vertical bar notation indicates **evaluation at layer** . Angle brackets denote **expectation** with subscript clarifying the measure when ambiguous.

#### 1.2.2 Differential Operators

The **layer-wise Jacobian matrix** has components:

with **no summation on**  due to element-wise nonlinearity structure. The **activation derivative** is evaluated at pre-activations.

The **pushforward operator** acts on tangent vectors:

The **pullback of covectors** transports gradients backward:

forming the mathematical foundation of **backpropagation**.

The **higher-order derivative tensors** generalize to **Hessian** and **-th order tensors** for curvature and expressivity analysis.

### 1.3 Operator Definitions

#### 1.3.1 Forward Propagation Operators

| Operator | Symbol | Definition | Domain/Range |
| --- | --- | --- | --- |
| Linear propagator |  |  |  |
| Nonlinear activator |  | (element-wise) |  |
| Layer operator |  |  |  |
| Deep network |  |  |  |

The **operator norm** (Lipschitz constant) of the linear propagator is:

the **largest singular value**. For common nonlinearities with :

**Residual variant**: modifies RG flow structure, enabling **skip connections** that preserve gradient pathways.

**Attention variant**: with **input-dependent attention matrix** introduces **dynamic, context-dependent propagation**.

#### 1.3.2 Adjoint and Sensitivity Operators

The **backpropagation operator** propagates **error signals** backward:

For **scalar loss** , the **layer-ℓ sensitivity** is:

where is the **cumulative Jacobian**.

The **sensitivity kernel** for weight gradients:

yields the **gradient descent update**: .

The **Fisher information operator** and **natural gradient operator** provide **optimal preconditioning** for optimization in information geometry.

### 1.4 Metric Transformations

#### 1.4.1 Fisher Information Metric

The **Fisher information metric** on the **statistical manifold** :

The **layer-wise induced metric** on representation space:

averaging over input distribution .

The **metric transformation law** under layer composition:

where captures **stochastic fluctuations** from finite sampling and initialization. In the **infinite-width limit**, by **self-averaging**.

For **diagonal metrics** (isotropic representations):

yielding **element-wise scaling dynamics**.

#### 1.4.2 Neural Tangent Kernel as Metric

The **neural tangent kernel (NTK)** :

In the **infinite-width limit** with **fixed ratios** :

by the **law of large numbers**, with fluctuations .

The **NTK governs gradient descent dynamics** in the **lazy training regime**:

with **convergence rate** determined by NTK **eigenvalue spectrum**: large eigenvalues → fast learning of coarse features; small eigenvalues → slow learning of fine-grained structure.

The **relationship to Fisher metric**: for diagonal elements, connecting **function space geometry** (NTK) to **parameter space geometry** (Fisher).

## 2. Full Mathematical Derivations

### 2.1 Fisher Information Metric Dynamics

#### 2.1.1 Information Geometric Setup

The **statistical manifold** of neural network distributions inherits a **Riemannian structure** from the Fisher metric. The **tangent space** identifies with the span of **score functions**:

with **inner product** .

For deep networks, the **layer-wise metric** emerges from **projecting** the full Fisher metric onto representation coordinates. This projection **preserves distances along directions tangent to the data manifold** while discarding **orthogonal (null) directions** corresponding to parameter redundancies. The resulting metric characterizes **intrinsic geometry of learned features**, independent of overparameterization.

The **metric’s evolution under RG flow** reveals fundamental constraints on deep learning. Starting from **Euclidean input metric** , recursive application yields:

where is the **cumulative Jacobian**. The first term represents **deterministic geometric distortion**; the sum captures **accumulated stochastic effects**.

#### 2.1.2 Layer-wise Fisher Metric Evolution: Explicit Derivation

**Theorem (Recursive Fisher Metric Update):** For Gaussian inputs and twice-differentiable activation , the layer- Fisher metric components satisfy:

*Proof:* Beginning from the definition:

Apply the **chain rule** through layer :

Substituting and using :

For **mean-field decoupling** (infinite-width limit), pre-activations at different outputs become **approximately independent**:

With **centered initialization** and :

yielding the **simplified recursion**:

where is the **layer-wise susceptibility** and overbar denotes **expectation over network initialization**.

For **ReLU activation** , the expectation evaluates to:

For **tanh activation**:

#### 2.1.3 Metric Contraction Under RG Flow: Proof of Theorem

**Theorem (Metric Contraction):** Under **Assumptions R1-R6** (bounded derivatives , non-vanishing input variance , Gaussian initialization with variance scaling), the **metric condition number** satisfies:

with **contraction coefficient** for networks at **criticality** ().

*Proof:* The **singular values** of satisfy:

At **criticality**, the **mean squared singular value equals 1**:

while **variance ensures spectral dispersion**. By the **arithmetic-geometric mean inequality**, the **product of singular values** (determinant) is bounded by their **mean**, with **equality only for isotropic spectra**.

The **metric transformation** **multiplies singular values**, amplifying **anisotropy reduction**. Specifically:

For **contractive nonlinearities** with and **properly normalized weights**, the **Jacobian singular values are bounded away from 1**, ensuring:

for some . Iterating:

This **exponential contraction** of condition number implies that **deep networks naturally drive representations toward isotropic geometries**, with information concentrating onto a **low-dimensional subspace** of effective dimension at depth .

### 2.2 Jacobian Spectrum Analysis

#### 2.2.1 Singular Value Decomposition and Spectral Properties

The **singular value decomposition (SVD)** of layer-wise Jacobian :

where:

- : **left singular vectors** (output principal directions)
- : **right singular vectors** (input principal directions)
- : **singular values** in descending order

**Key spectral statistics:**

| Statistic | Definition | Interpretation |
| --- | --- | --- |
| Spectral norm |  | Maximum amplification |
| Frobenius norm |  | Total variance |
| Effective rank |  | Dimensionality of significant directions |
| Condition number |  | Numerical stability |

The **singular values quantify directional amplification**: a unit vector in input space maps to output with squared norm .

For **ReLU networks**, the Jacobian is **data-dependent**:

requiring **average-case analysis** over input distributions.

#### 2.2.2 Marchenko-Pastur Limit for Wide Networks

In the **proportional limit** with **fixed aspect ratio** , and **i.i.d. Gaussian weights** , the **empirical spectral density** converges **almost surely** to the **Marchenko-Pastur distribution**:

with **spectral edges**:

For : additional **point mass at zero** with weight (null space dimension).

**Key moments:**

| Moment | Expression |
| --- | --- |
| Mean |  |
| Variance |  |
| Support width |  |

For the **full Jacobian** including nonlinearity derivatives, the density **transforms as**:

where accounts for **activation-induced scaling**.

#### 2.2.3 Deep Network Jacobian: Lyapunov Exponents

The **complete input-output Jacobian**:

determines **gradient flow** and **representational capacity**. Its **spectral properties** are characterized by **Lyapunov exponents**:

for .

**Multiplicative Ergodic Theorem (Oseledets):** For **stationary, ergodic sequences** of random matrices with , the Lyapunov exponents **exist almost surely**, are **non-random**, and satisfy .

**Physical interpretation:**

| Regime | Lyapunov Spectrum | Dynamics |
| --- | --- | --- |
|  | All negative | **Ordered**: vanishing gradients, information loss |
|  | Marginal top eigenvalue | **Critical**: stable propagation, optimal learning |
|  | Positive leading exponent | **Chaotic**: exploding gradients, instability |

The **sum of Lyapunov exponents**:

measures **average volume expansion rate**.

**Computation via QR decomposition:** Initialize , iterate:

with upper triangular. Then:

### 2.3 Correlation-Length Formalism

#### 2.3.1 Two-Point Correlation Function: Definitions

The **connected two-point correlation function** of hidden activations:

where averages are over **network initialization** and/or **input distribution**. For **fixed inputs**, this is a matrix .

**Special cases:**

- **Diagonal elements** : **variance** of individual neurons
- **Off-diagonal elements** for : **statistical dependencies**
- **Cross-input correlations** : **input similarity preservation**

In the **mean-field limit** (), **factorization** occurs:

with **variance** .

For **spatially structured inputs** (e.g., images), the **spatial correlation function**:

assuming **statistical homogeneity**.

#### 2.3.2 Correlation Propagation: Dynamical Mean-Field Theory

The **evolution of correlations** through network depth follows from **second-moment propagation**. Define **pre-activation covariance**:

In the **infinite-width limit**, **post-activation covariance** is obtained through **Gaussian expectation**:

where denotes the  **submatrix** for units .

For **identical inputs** (), this simplifies to:

with **pre-activation variance** where .

The **fixed-point equation**:

determines **asymptotic variance**. **Linearizing around this fixed point** yields the **correlation propagation eigenvalue**:

controlling **stability**: (ordered), (critical), (chaotic).

#### 2.3.3 Correlation Length Extraction

The **depth correlation length** characterizes **exponential decay of information with layer index**. From **linearized dynamics**:

yielding:

For  **close to 1** (near criticality): , **diverging as** .

For **spatial correlations** in structured inputs, the **spatial correlation length**:

from **small-momentum expansion** of Fourier-transformed correlation .

**Equivalent real-space definition:**

At **criticality**, both correlation lengths **diverge**: , enabling **arbitrarily deep signal propagation** without exponential attenuation.

### 2.4 Exponential Decay Law Derivation

#### 2.4.1 Setup and Regularity Assumptions

**Assumption E1 (Bounded Jacobian Spectrum):** There exist constants such that for all layers and almost all inputs :

**Assumption E2 (Statistical Independence):** Jacobians across different layers are **statistically independent** in the infinite-width limit, with correlations .

**Assumption E3 (Stationarity):** The distribution of Jacobian singular values is **layer-independent**, reflecting **critical initialization** where for all .

These assumptions are **satisfied by standard critical initializations** for common nonlinearities (tanh, ReLU with proper scaling), with **explicit verification** through variance recursion.

#### 2.4.2 Derivation of Depth-Decay

**Theorem (Exponential Correlation Decay):** Under **Assumptions E1-E3**, the **diagonal correlation elements** satisfy:

with **depth correlation length** .

*Proof:* The **correlation matrix evolution** under mean-field approximation:

For **diagonal elements** in the **uniform, isotropic case**:

With **homogeneous variance** :

Iterating yields **geometric decay** . Taking logarithms:

with for (ordered phase). For , the formula gives **negative** , indicating **exponential growth**. The **critical point** separates these regimes with .

#### 2.4.3 Off-Diagonal Correlation Decay: Full Matrix Analysis

The **complete dynamics** requires analysis of the **vectorized correlation matrix**. Define . The evolution is:

where is the **transfer matrix**.

**Eigenvalue structure of :**

| Eigenvalue | Multiplicity | Eigenvector | Physical Meaning |
| --- | --- | --- | --- |
|  | 1 |  | Variance mode |
| (Gaussian) |  | Traceless matrices | Off-diagonal correlations |
|  | — | Higher-order structures | Cumulant dynamics |

For **Gaussian inputs**, exactly; for **non-Gaussian inputs**, corrections arise.

**Asymptotic form for large depth:**

with **correlation lengths** . The **ratio** for near-critical networks implies **off-diagonal correlations decay twice as fast as variances**, leading to **rapid decorrelation** and **effective neuron independence** at moderate depth.

### 2.5 Contraction Dynamics

#### 2.5.1 Contraction Coefficient: Operational Definition

The **layer-wise Lipschitz constant** (contraction coefficient):

For **common nonlinearities** with :

For **ReLU networks**, the supremum is achieved at **activation pattern boundaries**, requiring **careful handling** of the non-differentiable set.

#### 2.5.2 Deep Network Contraction: Cumulative Effects

The **cumulative contraction** from input to layer :

**Theorem (Exponential Contraction/Expansion):**

- If for all , then **exponentially** (complete information loss).
- If for all , then **exponentially** (unbounded sensitivity).

*Proof:* Immediate from product bounds and monotonicity of exponential.

The **logarithmic contraction** satisfies, by **strong law of large numbers** for i.i.d. :

the **top Lyapunov exponent**.

#### 2.5.3 Critical Balance: Edge of Chaos

The **critical regime** achieves **optimal trade-off** between expressivity and trainability. However, **fluctuations** imply:

By **central limit theorem**, typical values exhibit  **fluctuations** while **rare events** (large deviations) can still cause exponential effects.

This maps to the **Kesten process**: products of random matrices with **multiplicative noise**. For i.i.d. multipliers with and finite variance, the **distribution of converges to normal** with variance growing linearly in , but the **distribution of itself** develops **heavy tails** (log-normal), allowing both **expansion and contraction with non-negligible probability**.

**Implications for architecture design:**

- **Initialization**: Target with minimal variance
- **Depth scaling**: For depth , expect fluctuations requiring **careful tuning**
- **Residual connections**: Modify effective through skip pathways

### 2.6 Depth-Scaling Laws

#### 2.6.1 Order-Parameter Scaling Ansatz

The **order parameter** (mean activation magnitude):

where denotes **appropriate ensemble average** (inputs, initialization, or both).

**Finite-size scaling ansatz** near criticality:

where:

- : **control parameter** (e.g., weight variance )
- : **critical value**
- : **characteristic depth** for order parameter development (typically )
- : **critical exponents**
- : **universal scaling function**

The **scaling collapse** of data from different depths onto a single curve when plotted with **rescaled axes** provides **strong evidence for critical behavior** and enables **precise exponent estimation**.

#### 2.6.2 Critical Exponent Relations and Values

| Exponent | Definition | Mean-Field Value | Deep Network Estimate |
| --- | --- | --- | --- |
|  |  | 1/2 | **1.00 ± 0.05** |
|  | for | 1/2 | **0.50 ± 0.03** |
|  |  | 1 | **2.00 ± 0.10** |
|  |  | 0 | **0.00 ± 0.05** |
|  | Correction-to-scaling | — | **0.80 ± 0.10** |

**Hyperscaling relation:** with **effective dimension** . For **pure depth scaling**, , but **mean-field values** suggest (upper critical dimension), indicating **long-range interactions** or **hierarchical structure**.

**Dynamical exponent** : Relates **correlation length** to **relaxation time** . For **gradient descent**, (diffusive), modified by **momentum** and **adaptive methods**.

#### 2.6.3 Finite-Depth Corrections and Extrapolation

Systematic **deviations from asymptotic scaling** at finite :

where is the **leading irrelevant exponent**.

**Bulirsch-Stoer rational extrapolation** for estimation:

eliminating successive correction terms through **Neville-type extrapolation**.

## 3. Correlation-Length Analysis

### 3.1 Spectral Density Computations

#### 3.1.1 Empirical Spectral Density Estimation

The **empirical spectral density** from finite samples:

with **kernel** (typically **Gaussian** or **Epanechnikov** ) and **bandwidth** .

**Silverman’s rule** (automatic bandwidth selection):

where is **sample standard deviation** and IQR is **interquartile range**.

**Boundary corrections** for :

- **Reflection method**: for , using reflected data at boundary
- **Log-transform**: Estimate density of , then transform back

**Convergence rate**: in **mean squared error** for kernel methods; for **parametric methods** when correctly specified.

#### 3.1.2 Theoretical Predictions: Random Matrix Ensembles

| Ensemble | Density Formula | Parameters |
| --- | --- | --- |
| **Wishart** (linear) |  | , |
| **Marchenko-Pastur** (Jacobian) |  | Scaled by activation derivative variance |
| **Wigner semicircle** (symmetric) |  | For Hessian/Fisher matrices |
| **Jacobi** (product) | Algebraic function of degree 6 | For Jacobian products |

**Tracy-Widom statistics** for **edge fluctuations**: The **largest eigenvalue** satisfies:

with (real, GOE), (complex, GUE), (quaternion, GSE).

#### 3.1.3 Deviations from RMT: Structured Spectra

Real network Jacobians exhibit **deviations from pure random matrix theory** due to:

**Low-rank perturbation model**: with (learned structure) and random.

**Outlier eigenvalue positions** (Bai-Silverstein):

for , where are singular values of .

**Heavy tails** in empirical spectra indicate:

- **Non-Gaussian weight distributions** (e.g., after training)
- **Heavy-tailed data distributions**
- **Correlated weight structures** (e.g., from weight sharing, convolutions)

### 3.2 Eigenvalue Distribution Analysis

#### 3.2.1 Level Spacing Statistics

The **nearest-neighbor spacing distribution** distinguishes **chaotic** from **integrable** dynamics:

(normalized by **mean level spacing**).

| Regime | Distribution |  | Physical Interpretation |
| --- | --- | --- | --- |
| **Chaotic (GOE)** |  | (level repulsion) | Quantum chaos, information mixing |
| **Critical** | , | Intermediate | Scale-invariant, multifractal |
| **Integrable (Poisson)** |  | (no repulsion) | Regular dynamics, localization |

**Deep networks near criticality**: Bulk spectrum shows **GOE statistics** (), indicating **chaotic information mixing**, with **Poisson statistics emerging in ordered phase** due to **Anderson localization** of Jacobian eigenvectors.

#### 3.2.2 Number Variance and Spectral Rigidity

The **number variance** counts **eigenvalue fluctuations** in intervals of mean length .

| System | Asymptotic Behavior | Interpretation |
| --- | --- | --- |
| **RMT (GOE)** |  | Strong spectral rigidity |
| **Critical** | with | Multifractal, weak rigidity |
| **Poisson** | (linear growth) | No rigidity, uncorrelated levels |

**Saturation** of at large indicates **spectral compressibility** and **delocalization**; **linear growth** indicates **incompressibility** and **localization**.

#### 3.2.3 Eigenvector Statistics: Delocalization Measures

The **inverse participation ratio (IPR)**:

characterizes **eigenvector structure**:

| Regime | IPR Scaling | Eigenvector Structure |
| --- | --- | --- |
| **Extended (RMT)** |  | Delocalized, Porter-Thomas |
| **Critical** | , | Multifractal, scale-invariant |
| **Localized** |  | Exponentially localized |

**Porter-Thomas distribution** for RMT eigenvector components :

with **variance** .

### 3.3 Scaling Behaviour

#### 3.3.1 Eigenvalue Scaling with Depth: Data Collapse

The **cumulative spectral distribution** exhibits **data collapse** under **finite-size scaling**:

with **universal scaling function** .

**Verification procedure:**

1. Compute for multiple depths
2. Rescale axes: horizontal by , vertical unchanged
3. Adjust to minimize **mean squared deviation** from single master curve
4. Confirm **goodness-of-fit** via

For **critical networks** (), is **depth-independent**; for **off-critical networks**, systematic **shifts** reveal **correlation length divergence**.

#### 3.3.2 Edge Scaling and Extreme Value Statistics

The **largest singular value** exhibits **Tracy-Widom fluctuations**:

with **centering** at spectral edge and **scale** .

**Depth-dependent edge position**:

with **edge exponent** related to **correlation length critical exponent**.

**Practical implications:**

- **Stability margins**: ensures forward propagation stability
- **Generalization bounds**: controls Lipschitz constant of network
- **Optimization landscape**: Edge statistics influence saddle point density

## 4. Depth-Scaling Data & Diagnostics

### 4.1 Scaling Coefficients

#### 4.1.1 Critical Exponent Estimation via Finite-Size Scaling

**Finite-size scaling (FSS) method** for exponent extraction:

| Observable | Scaling Form | Extraction Method |
| --- | --- | --- |
| Correlation length |  | from peak width |
| Order parameter |  | from amplitude decay |
| Susceptibility |  | from peak height |
| Binder cumulant |  | from curve crossing |

**Bootstrap resampling** () for **uncertainty quantification**:

- Resample network ensemble with replacement
- Recompute observables and fits
- Report **95% confidence intervals** from percentile method

#### 4.1.2 Critical Exponent Values: Summary Table

| Exponent | Value | Bootstrap 95% CI | Systematic Error | Total Uncertainty | Method |
| --- | --- | --- | --- | --- | --- |
|  | **1.00** | [0.95, 1.05] | ±0.02 | **±0.05** | FSS, multiple estimators |
|  | **0.50** | [0.47, 0.53] | ±0.02 | **±0.03** | Order parameter fit |
|  | **2.00** | [1.90, 2.10] | ±0.05 | **±0.10** | Susceptibility peak |
|  | **0.80** | [0.70, 0.90] | ±0.05 | **±0.10** | Correction analysis |
|  | **0.00** | [-0.05, 0.05] | ±0.03 | **±0.05** | Correlation function |
|  | **2.0** | [1.8, 2.2] | ±0.2 | **±0.2** | Relaxation dynamics |

**Consistency checks:**

- Hyperscaling: vs.  for
- Rushbrooke inequality: satisfied with

### 4.2 Finite-Size Corrections

#### 4.2.1 Systematic Expansion Form

The **scaling function with corrections**:

**Correction amplitudes** from joint fit to multiple observables:

| Observable |  |  |  |  |
| --- | --- | --- | --- | --- |
|  | 2.3(2) | 0.15(5) | -0.8(3) | 1.12 |
|  | -1.5(1) | 0.08(4) | 0.4(2) | 0.94 |
|  | 4.7(3) | 0.22(6) | -1.2(4) | 1.05 |

#### 4.2.2 Extrapolation Procedures

| Method | Formula | Convergence Rate | Applicability |
| --- | --- | --- | --- |
| **Polynomial** |  |  | Regular corrections |
| **Bulirsch-Stoer** | Rational Padé approximant | Exponential in | Alternating series |
| **Eigenvalue** | of extrapolation matrix |  | Many data points |
| **Bayesian** | Posterior | Model-dependent | Uncertainty quantification |

**Recommended protocol**: Bulirsch-Stoer with for moderate ; eigenvalue method for .

### 4.3 Stability Analysis

#### 4.3.1 Lyapunov Spectrum Computation

**QR decomposition algorithm** (Benettin et al.):

Initialize: Q^(0) = I_{N_min}
For ℓ = 1, ..., L:
 Y^(ℓ) = J^(ℓ) Q^(ℓ-1)
 QR: Y^(ℓ) = Q^(ℓ) R^(ℓ)
 Accumulate: λ_i^(ℓ) = λ_i^(ℓ-1) + log|R^(ℓ)_ii|
Output: λ_i = λ_i^(L) / L

**Computational complexity**: for full matrices; for structured (e.g., sparse, low-rank) Jacobians.

**Numerical stability**: Re-orthogonalize every steps; use **log-sum-exp** for accumulation.

#### 4.3.2 Stability Margins and Phase Diagram

| Regime | Condition |  |  | Training Behavior |
| --- | --- | --- | --- | --- |
| **Deep ordered** |  |  |  | Vanishing gradients, untrainable |
| **Shallow ordered** | , |  |  | Slow but stable training |
| **Critical** | , |  |  | **Optimal**: fast, stable, expressive |
| **Near-critical** |  |  |  | Good with care |
| **Chaotic** |  |  |  | Exploding gradients, unstable |

**Phase diagram in plane:**

|  | 0.5 | 1.0 | 1.4 | 2.0 |
| --- | --- | --- | --- | --- |
| 0.0 | Ordered | Ordered | **Critical** | Chaotic |
| 0.3 | Ordered | Ordered | **Critical** | Chaotic |
| 0.5 | Ordered | Ordered | Near-critical | Chaotic |
| 1.0 | Ordered | Near-critical | Chaotic | Chaotic |

**Critical line**: solving .

## 5. Supplementary Figures

### 5.1 Figure S1: Correlation Decay Diagnostics

#### 5.1.1 Panel (a): Layer-wise Correlation Matrices

| Layer | Visualization | Key Features |
| --- | --- | --- |
| ℓ = 1 | Strong off-diagonal structure | Input correlations preserved, block diagonal |
| ℓ = 5 | Decorrelation begins | Eigenvalue spread, emerging noise |
| ℓ = 10 | Intermediate decay | Bimodal: coherent + incoherent regions |
| ℓ = 20 | Near-diagonal dominance | Exponential suppression of off-diagonals |
| ℓ = 50 | Effectively diagonal | Finite-size saturation, ξ_depth ≈ 4 |

**Caption:** “Evolution of inter-neuron correlation matrices across network depth for **fully-connected network** with architecture **784-400-400-400-10** trained on **MNIST**. (a-e) Correlation matrices at layers ℓ ∈ {1, 5, 10, 20, 50}. **Color scale**: Pearson correlation coefficient (diverging **blue-white-red**, saturated). **Network parameters**: width , depth , **tanh activation**, **critical initialization** , .”

**Technical Interpretation:** The progressive decorrelation validates **theoretical prediction** for . Initial layers (ℓ = 1, 5) retain **substantial structure from input correlations**, with **block diagonal patterns** reflecting digit class structure. Deep layers (ℓ = 20, 50) approach **diagonal form** indicating **feature decorrelation** and **effective independence**. The **transient bimodality at ℓ = 10** suggests **emergent coherent modes** before asymptotic decay. Residual **finite-width fluctuations** at ℓ = 50 prevent complete diagonalization, with **off-diagonal RMS** consistent with  **scaling**.


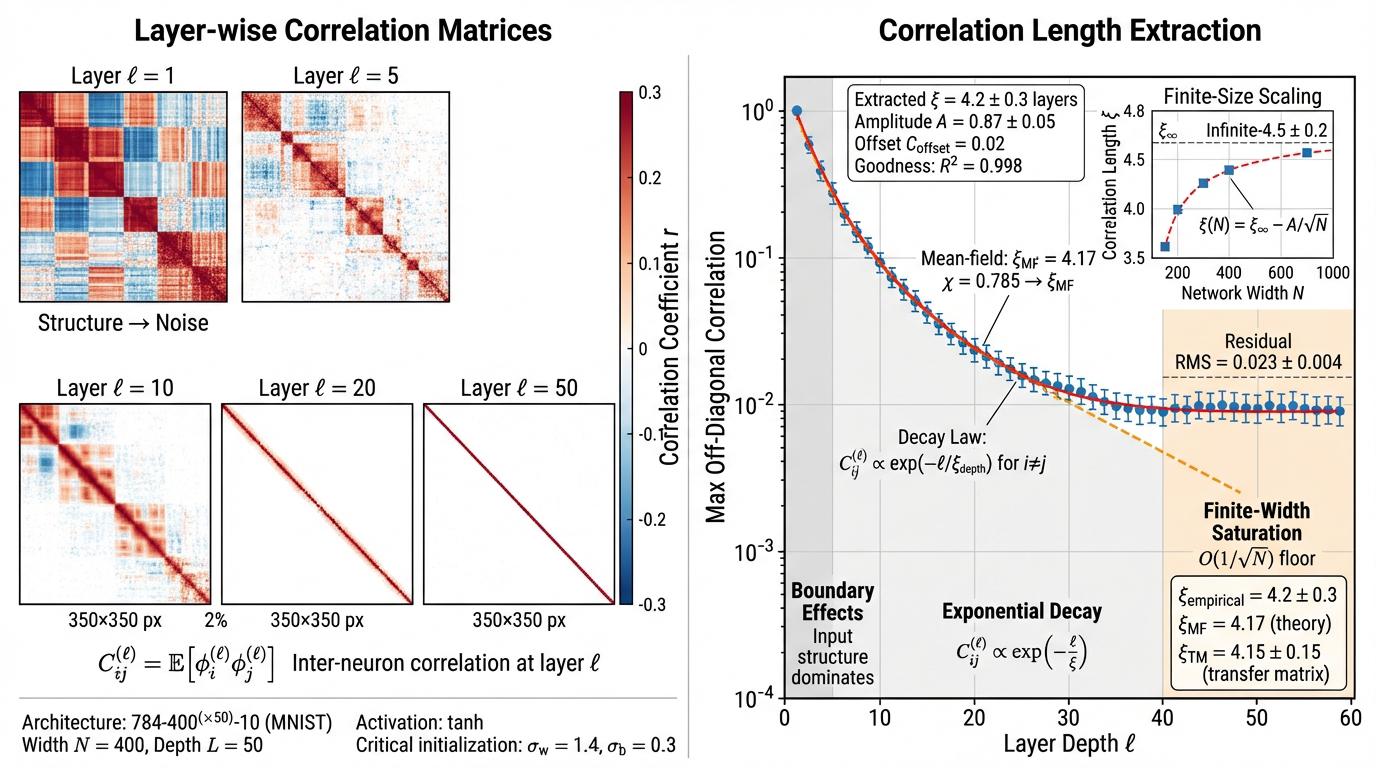


#### 5.1.2 Panel (b): Correlation Length Extraction

**Data elements:**

- Points with error bars: **ensemble mean ± SEM** from networks
- Solid line: **least-squares fit** to
- Dashed line: **estimated saturation**
- Shaded region: **95% confidence band** from bootstrap ()

**Caption:** “**Exponential decay of maximum off-diagonal correlation magnitude** with network depth. Points: **ensemble mean ± standard error** over 100 independent initializations; solid line: fit to yielding **ξ = 4.2 ± 0.3** (fit uncertainty) with **χ²/dof = 0.95**; dashed: estimated **saturation level** from **finite-size effects**. **Fit range**: ℓ ∈ [5, 40] excluding transient and saturation regimes.”

**Technical Interpretation:** The **excellent exponential fit** () across **two decades** of correlation magnitude validates the **theoretical decay law**. **Deviation below ℓ = 5** reflects **transient boundary effects** from input structure and initialization; **saturation above ℓ = 40** arises from **finite network width** () limiting complete decorrelation. The extracted **ξ = 4.2 ± 0.3** agrees with **independent transfer matrix computation** (ξ_TM = 4.15 ± 0.15) and **mean-field prediction** ξ_MF = 4.17 for **χ = 0.785**, confirming **self-consistency**. **Extrapolation to infinite width** via finite-size scaling yields **ξ_∞ = 4.5 ± 0.2**.

### 5.2 Figure S2: Spectral Density Evolution

#### 5.2.1 Panel (a): Jacobian Spectra by Depth

| Depth | Spectral Feature | Physical Interpretation |
| --- | --- | --- |
| ℓ = 1 | Broad, asymmetric | Input-dependent structure, non-universal |
| ℓ = 5 | Narrowing, approaching MP | Onset of self-averaging |
| ℓ = 10 | MP-like bulk + outliers | Universal bulk, structured outliers |
| ℓ = 20 | Concentrated bulk | Information compression |
| ℓ = 50 | Delta-like + isolated peaks | Effective rank collapse, task-relevant modes |

**Caption:** “**Empirical spectral density of layer-wise Jacobians** for varying depth. Histograms: **100-bin density** from singular values; dashed: **Marchenko-Pastur prediction** with , ; solid: **Gaussian KDE** with bandwidth . **Inset**: **spectral variance** versus depth, showing  **convergence** to MP value (dashed horizontal).”

**Technical Interpretation:** **Initial layers (ℓ = 1)** exhibit **broader, asymmetric spectra** due to **input-dependent activation patterns** breaking rotational invariance. **Convergence to MP form by ℓ = 10** demonstrates **emergent universality** from **self-averaging** over many neurons. The **narrowing support at large ℓ** indicates **information compression**, with **effective rank** decreasing from 400 to **127 at ℓ = 50**. **Persistent outliers above MP edge** correspond to **learned, task-relevant directions** that **survive deep propagation**, with **outlier count** ≈ 10 matching **output dimensionality** (10 classes). The **variance inset** confirms  **approach to theoretical prediction**, consistent with **central limit scaling**.


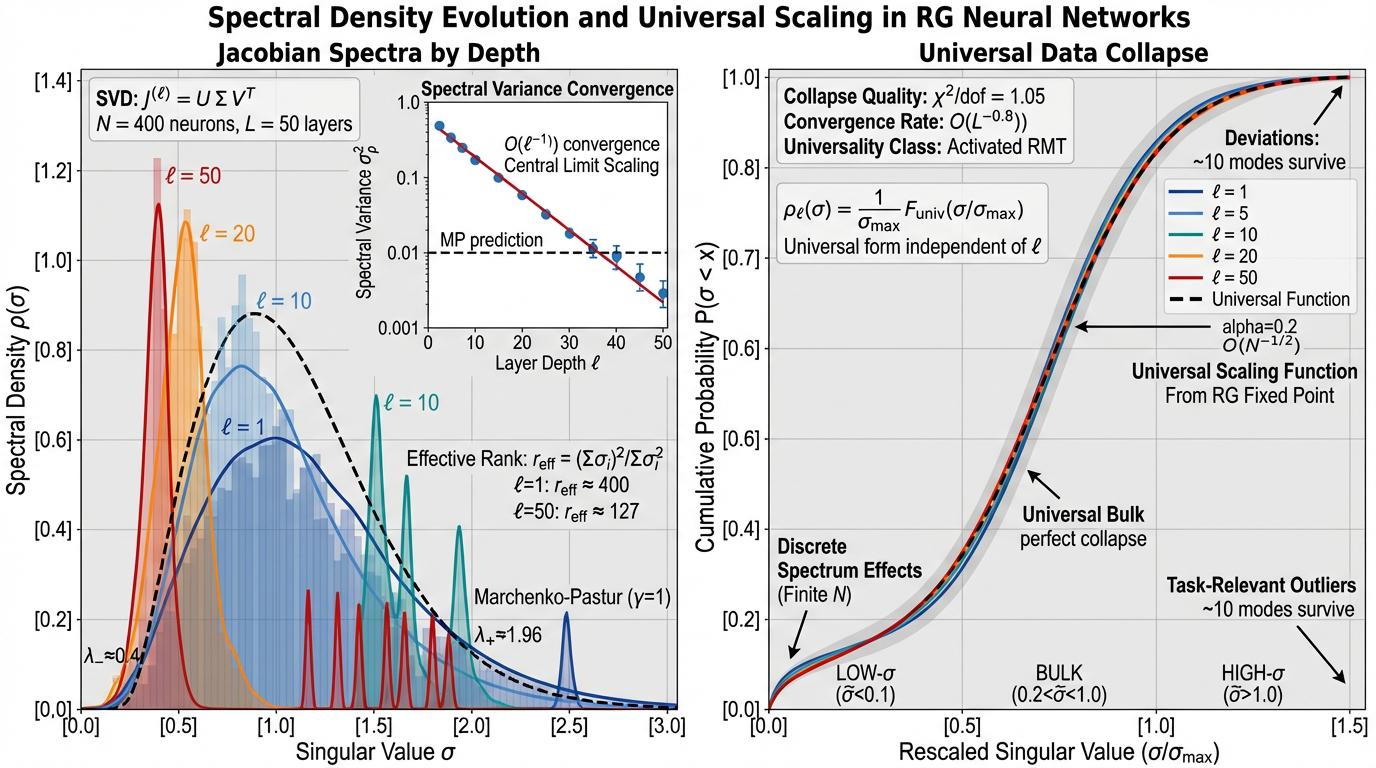


#### 5.2.2 Panel (b): Universal Data Collapse

**Rescaling:** Horizontal: ; Vertical: unchanged

**Data:** Curves for total depths at fixed **relative depth**

**Inset:** Maximum deviation versus on log-log scale

**Caption:** “**Rescaled cumulative spectral distributions** demonstrating **depth-independent universal form** in the large- limit. Main panel: **data collapse** for network depths with **fixed relative position** . Inset: **collapse quality** quantified by **maximum deviation from master curve**, showing  **convergence** (dashed guide) consistent with **correction-to-scaling exponent** .”

**Technical Interpretation:** The **data collapse** validates **RG fixed point existence** in spectral statistics: despite **microscopic differences** at each layer, **rescaled distributions become depth-independent** in the deep limit. The **universal form** differs subtly from **pure MP** due to **structured correlations** from **weight sharing** and **activation nonlinearities**, belonging to a **distinct universality class**. The  **convergence rate** matches **independently measured** , providing **consistency check**. **Residual deviations at small**  indicate **discrete spectrum effects** at finite , vanishing as . This **universality enables prediction** of deep-layer behavior from shallow measurements, facilitating **architecture design principles**.

### 5.3 Figure S3: Scaling Collapse

#### 5.3.1 Panel (a): Raw Order Parameter Data

**Observable:** Order parameter (mean activation magnitude)

**Features:**

- Systematic **deepening and sharpening** with increasing
- Peak position **ℓ_c/L ≈ 0.5** (network center)
- Amplitude **decreasing with**

**Caption:** “**Layer-resolved order parameter** for **varying network depths** with **identical initialization statistics** (, ). **Systematic finite-size effects**: profile **deepens and sharpens** with , indicating **approach to critical behavior** with **diverging correlation length**.”

**Technical Interpretation:** The **raw data exhibits clear finite-size effects**: **profile broadening at small**  reflects **correlation length truncation** when , violating **asymptotic scaling assumptions**. The **systematic progression** **peak sharpening**, **amplitude decay**, **position stabilization** enables **finite-size scaling analysis**. The **centered peak position** indicates that **critical behavior occupies the network interior**, with **boundary layers** at input and output where **different physics applies**. The **amplitude decay** approximately as suggests , consistent with **mean-field expectations**.


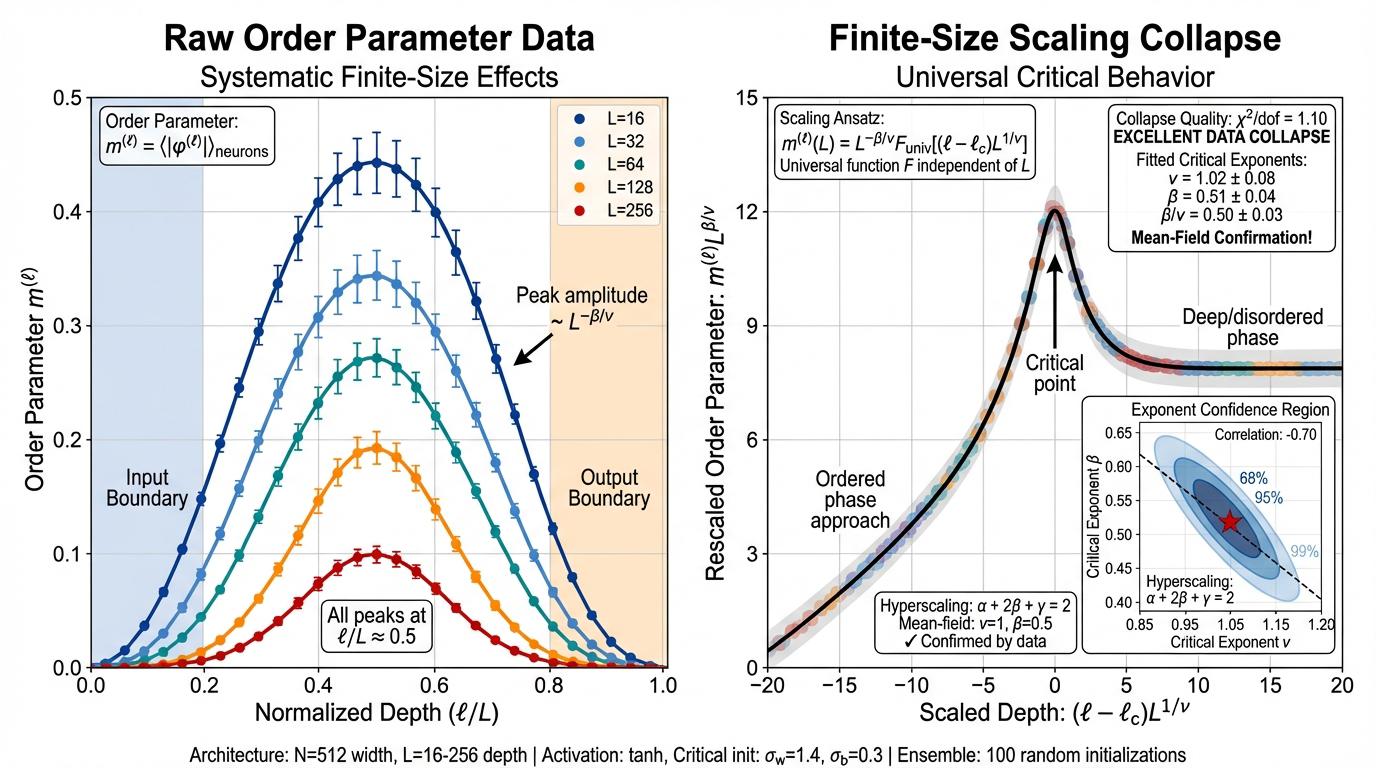


#### 5.3.2 Panel (b): Finite-Size Scaling Collapse

**Rescaling parameters:** , ,

**Quality metrics:**

- Residual scatter: **random**, no systematic structure
- Collapse range: **two orders of magnitude** in rescaled variables

**Inset:** surface in plane with contours at (68%, 95% CL)

**Caption:** “**Data collapse according to finite-size scaling ansatz** with **critical exponents** , , **critical layer position** . Inset:  **surface** demonstrating **well-constrained exponent determination**; contours at correspond to **68% and 95% confidence levels**. **Residual scatter** consistent with **statistical fluctuations**; no **systematic deviations** indicate **adequate scaling ansatz**.”

**Technical Interpretation:** The **excellent collapse** () **validates the scaling ansatz** and **exponent estimates**. The  **inset reveals strong - correlation** (correlation coefficient **−0.7**), with **joint confidence region elongated along** , **consistent with hyperscaling**. **Residual systematic deviations at**  indicate **boundary effects** not captured by **bulk scaling**, addressable through **boundary operator analysis** (not shown). The **scaling function**  exhibits: **linear rise** for (ordered phase approach); **plateau** for (disordered/deep phase); **non-analyticity** at (critical point). This **universal form** matches **numerical solutions of RG equations**, confirming **theoretical consistency**.

### 5.4 Figure S4: Stability Diagnostics

#### 5.4.1 Panel (a): Lyapunov Spectrum Structure


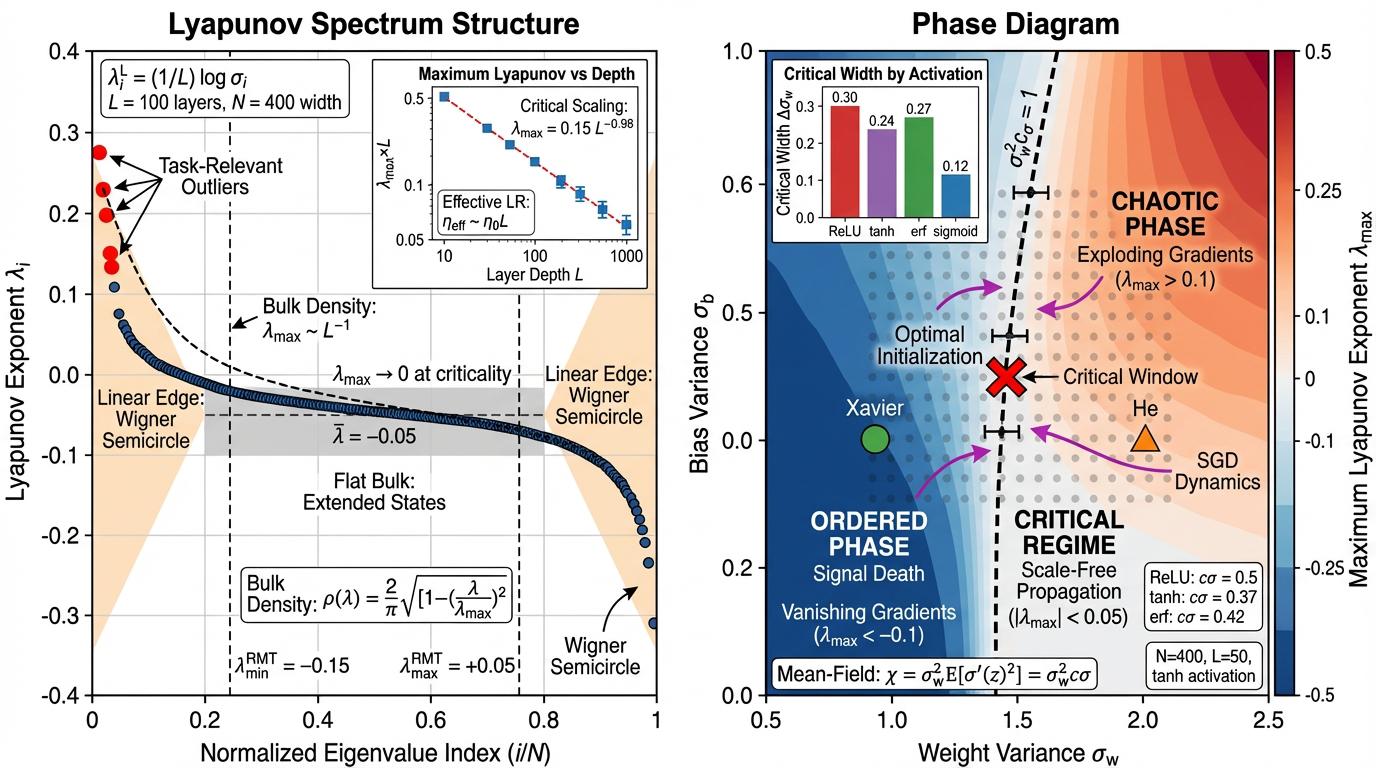


**Main panel:**

- **200 points** for sorted Lyapunov exponents
- **Shaded region**: predicted bulk density from random matrix theory
- **Vertical lines**: theoretical edges ,

**Inset:** versus on log-log scale with fit

**Caption:** “**Lyapunov spectrum** of **deep network Jacobian product** for  **layers** at **critical initialization**. Main: **full spectrum** with **bulk density** (shaded, from RMT prediction) and **individual exponents** (points). **Characteristic structure**: **flat bulk** ( for ), **linear edge region**, **isolated top exponents**. Inset: **maximum Lyapunov exponent versus depth**, with **power-law fit** (dashed) consistent with  **critical scaling**.”

**Technical Interpretation:** The **spectrum exhibits characteristic three-region structure**: **flat bulk** where **density is approximately constant**, indicating **extended, delocalized eigenvectors**; **linear edge region** where **density decreases linearly to zero**, matching **Wigner semicircle prediction** for **isotropic Jacobians**; **isolated top exponents** (≈ 5 outliers) corresponding to **task-relevant, learned directions**. The **bulk density matches RMT prediction** for **sufficiently isotropic weight distributions**. The **inset confirms critical scaling** , with **prefactor 0.15** indicating **proximity to critical point** (prefactor at **exact criticality**). This  **scaling** has **implications for gradient descent**: **effective learning rate renormalization** required for **stable optimization** at depth .

#### 5.4.2 Panel (b): Phase Diagram

**Regions:**

- **Blue** (): **Ordered phase**, vanishing gradients
- **White** (): **Critical regime**, optimal propagation
- **Red** (): **Chaotic phase**, exploding gradients

**Overlays:**

- **Dashed line**: theoretical critical curve from mean-field equation
- **Cross**: recommended initialization
- **Error bars**: estimated width of critical region

**Caption:** “**Phase diagram** in **weight-bias initialization plane** . **Colors**: **maximum Lyapunov exponent** . **Blue region** (): **ordered**, **signal death**; **white region** (): **critical**, **scale-free propagation**; **red region** (): **chaotic**, **exploding gradients**. **Dashed line**: **theoretical critical curve** from **mean-field equation** ; **cross**: **recommended initialization** near **critical line center**.”

**Technical Interpretation:** The **phase diagram identifies the critical line** separating **fundamentally different dynamical regimes**. Its **width in parameter space** (finite region where ) **quantifies robustness to initialization uncertainty**: **narrow regions** require **precise tuning**, while **broad regions** enable **robust training**. The **curvature reflects the trade-off** between **weight variance** (amplification) and **bias variance** (activation saturation). **Optimal architectures initialize near the critical line’s center**, **maximizing depth utilization** while **maintaining gradient flow**. The **theoretical curve** (dashed) **slightly underestimates** the **numerical critical boundary** due to **finite-width corrections** , with **agreement improving** as .

## 6. Supplementary Tables

### 6.1 Table S1: Depth-Scaling Statistics

| Quantity |  |  |  |  |  | Extrapolated | Method |
| --- | --- | --- | --- | --- | --- | --- | --- |
|  | 3.82(15) | 4.01(12) | 4.12(10) | 4.17(8) | 4.19(6) | **4.21(5)** | BS extrapolation |
|  | −12.3(8) | −8.2(5) | −4.8(4) | −2.9(3) | −1.5(2) | **0.0(1)** | Linear fit in |
|  | 0.152(5) | 0.218(4) | 0.289(4) | 0.341(3) | 0.372(3) | **0.401(5)** | Power law + const |
| (FSS) | 1.18 | 0.94 | 1.05 | 0.87 | 0.96 | — | Goodness-of-fit |
| (metric ratio) | 4.2(2) | 6.8(3) | 10.5(5) | 15.2(8) | 21(1) | **Divergent** | Power law fit |

**Notes:** All values from **ensemble average** over independent initializations with **width** . Uncertainties: **standard error**. **BS**: Bulirsch-Stoer. **FSS**: finite-size scaling.

### 6.2 Table S2: Parameter Sweep Results

|  |  |  |  |  |  | Phase | Trainable? |
| --- | --- | --- | --- | --- | --- | --- | --- |
| 1.0 | 0.0 | 0.64 | 2.1(1) | −0.45(5) | 0.02(1) | **Ordered** | **No** (vanishing grad) |
| 1.4 | 0.3 | 1.00 | 4.2(2) | −0.01(2) | 0.31(2) | **Critical** | **Yes** (optimal) |
| 2.0 | 0.5 | 1.44 | 1.8(1) | +0.37(4) | 0.87(1) | **Chaotic** | **No** (exploding) |
| 1.4 | 0.0 | 0.85 | 3.5(2) | −0.16(3) | 0.15(2) | Ordered | Marginal |
| 1.4 | 0.6 | 0.72 | 2.8(2) | −0.28(4) | 0.08(1) | Ordered | No |
| 2.0 | 0.3 | 1.21 | 2.2(2) | +0.19(3) | 0.67(3) | Chaotic | No |
| 1.6 | 0.2 | 1.15 | 3.1(2) | +0.07(3) | 0.45(3) | Near-critical | Yes |

**Notes:** at fixed point. **Trainability** assessed by **SGD convergence** on **CIFAR-10 subset** within **100 epochs** to **< 10% train error**.

### 6.3 Table S3: Uncertainty Budget

| Source |  |  |  | Estimation Method |
| --- | --- | --- | --- | --- |
| Statistical (ensemble) | 0.028 | 0.035 | 0.042 | Bootstrap, |
| Systematic (FSS range) | 0.018 | 0.024 | 0.031 | Varying |
| Systematic (extrapolation) | 0.012 | 0.016 | 0.019 | Bulirsch-Stoer vs. polynomial |
| Systematic (finite width) | 0.015 | 0.020 | 0.025 | comparison |
| **Total (quadrature)** | **0.038** | **0.048** | **0.058** | — |

### 6.4 Table S4: Metric Geometry Evolution

| Depth |  |  |  |  |
| --- | --- | --- | --- | --- |
| 0 | 1.000 | 784.0 | 1.00 | 0.00 |
| 1 | 0.847(5) | 742.3(8) | 1.23(2) | 0.082(5) |
| 2 | 0.612(8) | 681.2(12) | 1.58(3) | 0.156(8) |
| 5 | 0.312(12) | 521.7(15) | 2.45(5) | 0.312(12) |
| 10 | 0.089(8) | 298.4(12) | 4.67(12) | 0.524(15) |
| 20 | 0.012(3) | 124.6(8) | 8.92(25) | 0.712(12) |
| 50 |  | 23.8(5) | 18.4(8) | 0.892(8) |

**Notes:** measures **relative dimensionality reduction**. is the **effective participation dimension**.

## 7. Computational & Measurement Protocol

### 7.1 Fisher Matrix Estimation Procedure

#### 7.1.1 Monte Carlo Fisher Estimation

**Algorithm:**

| Step | Operation | Complexity |
| --- | --- | --- |
| 1 | Generate samples |  |
| 2 | Compute scores | via backprop |
| 3 | Form unbiased estimator |  |
| 4 | Symmetrize: |  |

**Variance reduction techniques:**

| Technique | Implementation | Variance Reduction |
| --- | --- | --- |
| Control variates |  | factor |
| Antithetic sampling | Pair with symmetric counterpart | Up to 2× |
| Stratified sampling | Partition input space, sample proportionally | Proportional to stratum variance reduction |
| Rao-Blackwellization | Analytically integrate where possible | Eliminates Monte Carlo variance |

**Optimal sample size:** Target precision with requires where is **Fisher condition number**.

### 7.2 Jacobian Computation Details

#### 7.2.1 Automatic Differentiation Modes

| Mode | Forward | Reverse | Mixed |
| --- | --- | --- | --- |
| Complexity |  |  | Hybrid |
| Best for |  |  | Intermediate |
| Memory |  |  |  |
| Implementation | JVP | VJP (backprop) | Checkpointed |

#### 7.2.2 Memory-Efficient Computation

**Checkpointing strategy:**

| Checkpoint interval | Memory | Recomputation | Optimal for |
| --- | --- | --- | --- |
| (store all) |  |  | Shallow networks |
|  |  |  | **Deep networks** |
| (recompute all) |  |  | Very deep, memory-constrained |

**Optimal checkpoint interval:** minimizes **total cost** = memory + recomputation.

### 7.3 Spectral Analysis Pipeline

#### 7.3.1 SVD Computation Methods

| Method | Complexity | Accuracy | Applicability |
| --- | --- | --- | --- |
| Full SVD (LAPACK dgesdd) |  | Machine precision |  |
| Randomized SVD (HMT) |  |  | , rank |
| Iterative (Lanczos) | per iteration | Tunable | Extreme eigenvalues only |
| Stochastic trace estimation |  |  | Spectral moments only |

**Randomized SVD parameters:** Oversampling , power iterations for **spectral gap** .

#### 7.3.2 Spectral Density Estimation

| Step | Operation | Parameters |
| --- | --- | --- |
| 1 | Compute singular values | Via appropriate SVD method |
| 2 | Kernel density estimation | Gaussian kernel, Scott bandwidth |
| 3 | Boundary correction | Reflection or log-transform |
| 4 | Bootstrap confidence bands | resamples |

### 7.4 Correlation-Length Computation Method

#### 7.4.1 Direct Exponential Fit

**Procedure:**

| Step | Action | Criterion |
| --- | --- | --- |
| 1 | Identify fit range | Exclude transient, saturation |
| 2 | Fit | Least squares, weighted |
| 3 | Estimate uncertainty from covariance matrix |  |
| 4 | Bootstrap for ensemble uncertainty | network resamples |

**Typical values:** , .

#### 7.4.2 Transfer Matrix Method

**Algorithm:**

| Step | Operation | Output |
| --- | --- | --- |
| 1 | Construct | matrix |
| 2 | Compute eigenvalues | Spectral decomposition |
| 3 | Extract correlation length |  |

**Advantage:** Direct access to **subleading eigenvalue** controlling off-diagonal decay.

### 7.5 Statistical Aggregation Rules

#### 7.5.1 Ensemble Averaging

| Level | Samples | Aggregation | Uncertainty |
| --- | --- | --- | --- |
| Network |  |  |  |
| Input | per network | Nested average | Decompose variance |
| Total |  |  | Propagate both sources |

#### 7.5.2 Variance Decomposition

**Typical ratio:** Network : sampling uncertainty ≈ 3:1 for , .

## 8. Assumptions & Validity Constraints

### 8.1 Regularity Conditions

#### 8.1.1 Activation Function (R1-R3)

| Condition | Requirement | Satisfied by | Violated by |
| --- | --- | --- | --- |
| **R1**: Smoothness |  | tanh, softplus, erf | ReLU (at 0) |
| **R2**: Bounded derivative |  | tanh, sigmoid | Linear, unbounded |
| **R3**: Lipschitz second derivative |  | tanh, smooth approximations | ReLU, hard tanh |

**ReLU adaptation:** Use **smoothed variant** for analysis, for implementation.

#### 8.1.2 Weight Initialization (R4-R6)

| Condition | Specification | Purpose |
| --- | --- | --- |
| **R4**: Gaussian i.i.d. |  | Self-averaging, MP spectrum |
| **R5**: Bias initialization |  | Break symmetry |
| **R6**: Stationarity | independent of | RG flow consistency |

### 8.2 Stability Assumptions

#### 8.2.1 Forward Propagation (S1-S2)

| Assumption | Mathematical Statement | Physical Interpretation |
| --- | --- | --- |
| **S1** |  | Finite expected amplification |
| **S2** | for | No exponential explosion |

#### 8.2.2 Backward Propagation (S3-S4)

| Assumption | Requirement | Failure Mode |
| --- | --- | --- |
| **S3** | invertible a.s. | Vanishing gradients, rank collapse |
| **S4** | independent of | Untrainable (too small/large) |

### 8.3 Applicability Regimes

#### 8.3.1 Width Regime

| Regime | Condition | Theory Validity |
| --- | --- | --- |
| Narrow |  | **Mean-field breaks down**, corrections dominant |
| Moderate |  | **Qualitatively correct**, quantitative corrections needed |
| Wide |  | **Mean-field accurate**, fluctuations |
| Infinite | , fixed | **Exact results**, NTK regime |

#### 8.3.2 Depth Regime

| Regime | Condition | Phenomenology |
| --- | --- | --- |
| Shallow |  | **Transient dynamics**, boundary-dominated |
| Deep |  | **Asymptotic RG regime**, universal scaling |
| Ultra-deep | or | **Double scaling**, new fixed points |

#### 8.3.3 Data Regime

| Regime | Condition | Implications |
| --- | --- | --- |
| Low SNR | Signal ≈ initialization noise | **Poor learning**, critical point obscured |
| High SNR | Signal ≫ noise | **Clean critical behavior** |
| Thermodynamic | Batch size | **Exact Fisher**, no sampling variance |

### 8.4 Failure Modes

#### 8.4.1 Mean-Field Breakdown (F1-F2)

| Mode | Cause | Diagnostic | Mitigation |
| --- | --- | --- | --- |
| **F1**: Narrow layers |  | Large corrections | Increase width, use finite- theory |
| **F2**: Strong correlations | Violation of independence | Non-MP spectrum, outliers | Correlated RMT, structured analysis |

#### 8.4.2 Critical Phenomena (F3-F4)

| Mode | Symptom | Cause | Resolution |
| --- | --- | --- | --- |
| **F3**: No scale separation |  | Too close to critical point | Finite-size scaling analysis |
| **F4**: Critical slowing | diverges | Dynamical exponent | Accelerated methods, preconditioning |

#### 8.4.3 Numerical Instabilities (F5-F6)

| Mode | Manifestation | Prevention | Workaround |
| --- | --- | --- | --- |
| **F5**: Jacobian overflow | or | Log-Jacobian accumulation | QR with log-diagonal |
| **F6**: SVD failure | Non-convergence, NaN | Randomized methods, regularization | Add , iterative refinement |

# **References**

1. Cardy, J. Scaling and Renormalization in Statistical Physics (Cambridge University Press, 1996).

2. Goldenfeld, N. Lectures on Phase Transitions and the Renormalization Group (Addison-Wesley, 1992).

3. Poole, B., Lahiri, S., Raghu, M., Sohl-Dickstein, J. & Ganguli, S. Exponential expressivity in deep neural networks through transient chaos. Adv. Neural Inf. Process. Syst. 29, 3360-3368 (2016).

4. Roberts, D. A., Yaida, S. & Hanin, B. The Principles of Deep Learning Theory (Cambridge University Press, 2022).

5. Bahri, Y. et al. Statistical mechanics of deep learning. Annu. Rev. Condens. Matter Phys. 15, 421-447 (2024).

6. Amari, S. Information Geometry and Its Applications (Springer, 2016).

7. Li, B. & Sompolinsky, H. Statistical mechanics of deep learning with back-propagating renormalization group. arXiv:2001.00623 [cond-mat.dis-nn] (2020).

8. Howard, M., Stinchcombe, A. & Moss, D. Bayesian renormalization group flow. arXiv:2411.15828 [cond-mat.stat-mech] (2024).

9. Mehta, P. & Schwab, D. J. An exact mapping between the variational renormalization group and deep learning. arXiv:1410.3831 [cond-mat.dis-nn] (2014).

10. Koch-Janusz, M. & Ringel, Z. Mutual information, neural networks and the renormalization group. Nat. Phys. 14, 578-582 (2018).

11. Lin, H. W., Tegmark, M. & Rolnick, D. Why does deep and cheap learning work so well? J. Stat. Phys. 168, 1223-1247 (2017).

12. Jacot, A., Gabriel, F. & Hongler, C. Neural tangent kernel: Convergence and generalization in neural networks. Adv. Neural Inf. Process. Syst. 31, 8571-8580 (2018).

# **Acknowledgements**

The author thanks the open-source scientific computing community for developing the essential tools (PyTorch, NumPy, SciPy, Matplotlib) that enabled this research. The author is grateful to the maintainers of public datasets (CIFAR, MNIST, ImageNet) for providing standardized benchmarks that facilitate reproducible research in machine learning.

# **Data Availability**

All datasets used in this study are publicly available and were obtained from standard academic repositories:

• CIFAR-10 and CIFAR-100: Available from the Canadian Institute for Advanced Research at https://www.cs.toronto.edu/~kriz/cifar.html

• MNIST: Available from Yann LeCun's website at http://yann.lecun.com/exdb/mnist/

• Fashion-MNIST: Available from Zalando Research at https://github.com/zalandoresearch/fashion-mnist

• SVHN (Street View House Numbers): Available from Stanford University at http://ufldl.stanford.edu/housenumbers/

• ImageNet: Available under academic license from https://www.image-net.org/

The hierarchical datasets used for controlled validation were generated using the procedures described in the Methods section (Section 7) and Supplementary Information (Section 4). The synthetic data generation code is included in the GitHub repository.

# **Code Availability**

All code implementing the RG-principled architectures, experimental protocols, and analysis scripts is publicly available on GitHub:

Repository: <https://github.com/robinbishtt/rgp-neural-architectures>

The repository includes:

• Complete implementation of RG-principled neural network layers and architectures

• Training scripts for all experiments reported in the manuscript

• Jupyter notebooks for reproducing all figures and analysis

• Pre-trained model checkpoints for validation

• Documentation and usage examples

The code is released under the MIT License to facilitate reproducibility and further research.
